# Supplementary material for: High seasonal and spatial dynamics of bio- and photodegradation in boreal humic waters
Source: Copernicus journal article supplement (doi:10.5194/egusphere-2024-233), 2024-02-13
Supplement: Supplementary file 1 [file egusphere-2024-233-supplement.pdf]

## SUPPLEMENTARY MATERIAL

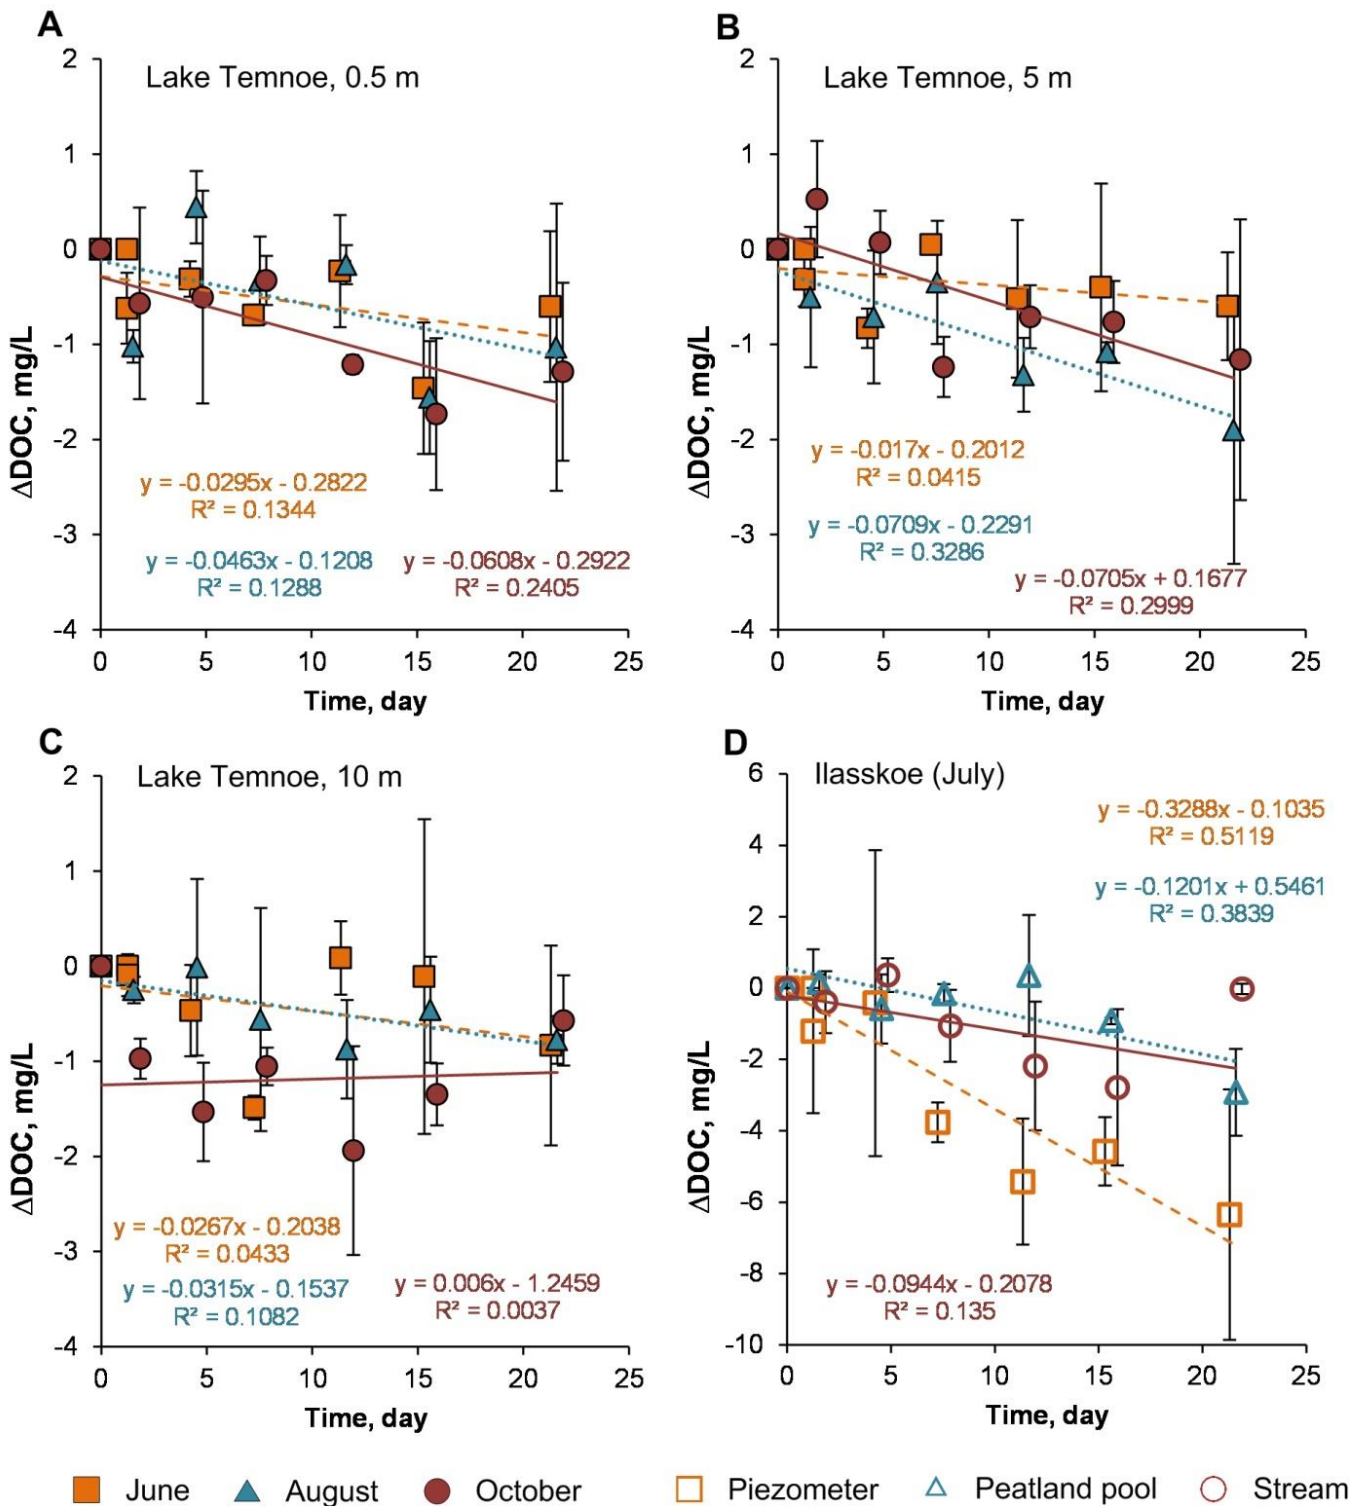

**Fig. S1.** The change of DOC concentration over time in biodegradation experiments. The error bars represent 1 s.d. of duplicates unless within the symbol size. Lake Temnoe 0.5 m (A), 5 m (B) and 10 m (C) in June (squares), August (triangles) and October (circles). Ilasskoe continuum in July (D) includes piezometer (open squares), peatland pool Severnoe (open triangles) and stream Chernyi (open circles)

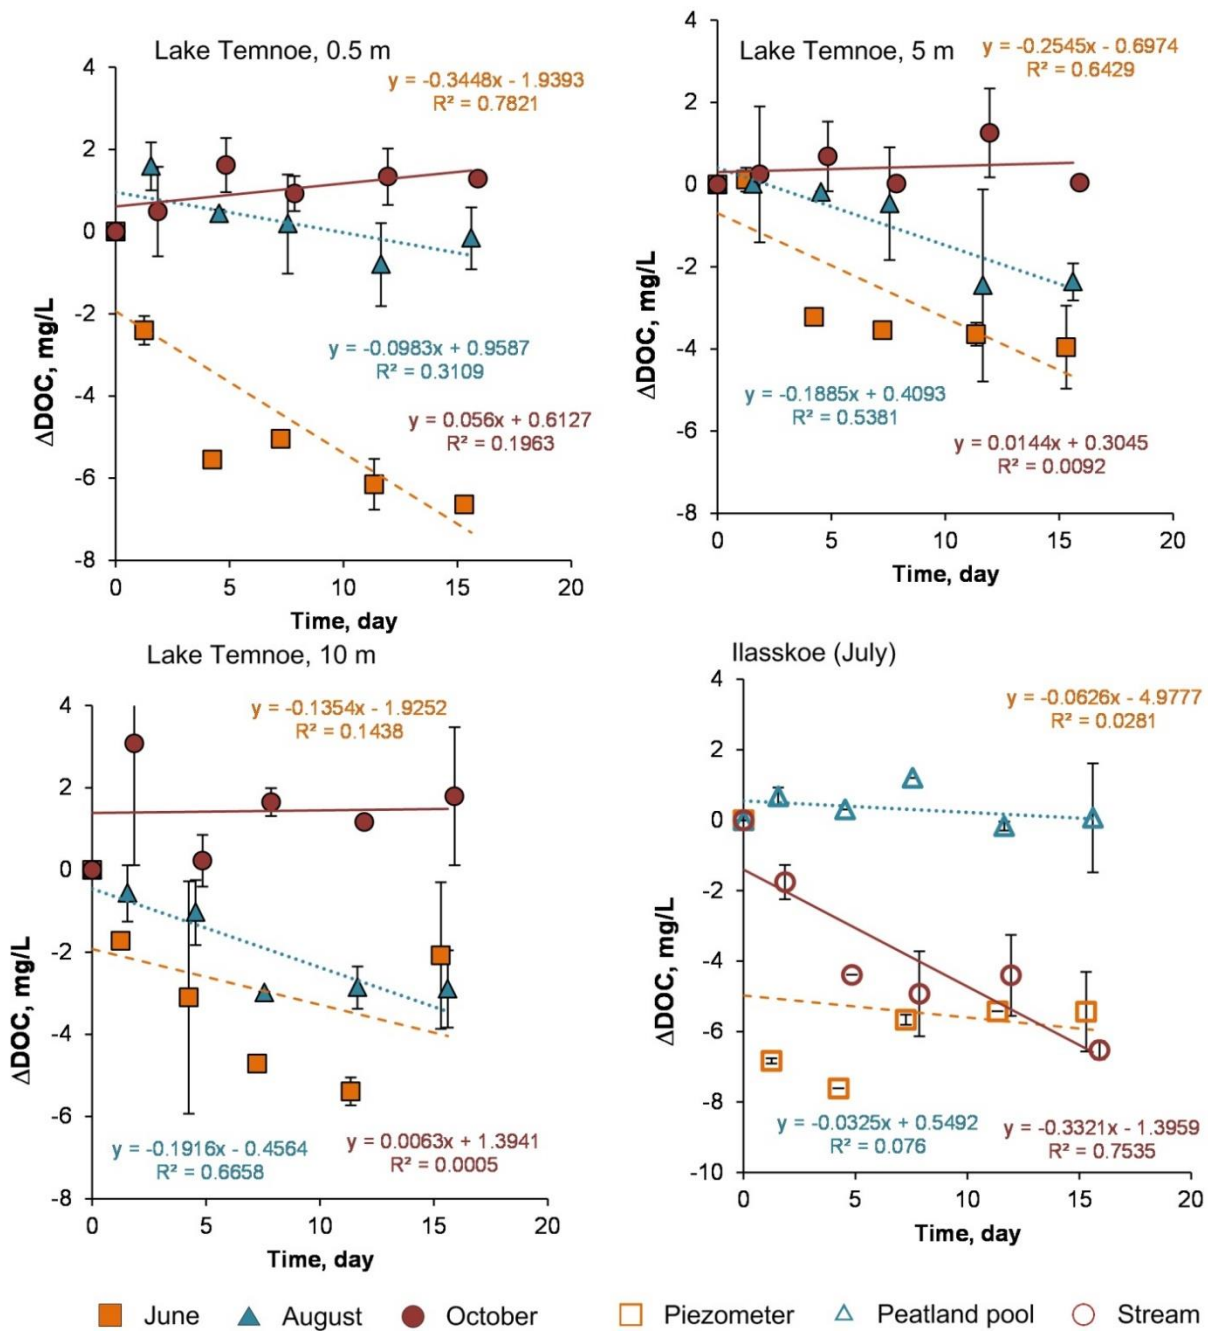

**Fig. S2.** The change of DOC concentration over time in photodegradation experiments. The error bars represent 1 s.d. of duplicates. Lake Temnoe 0.5 m (A), 5 m (B) and 10 m (C) in June (squares), August (triangles) and October (circles). Ilasskoe continuum in July (D) includes piezometer (open squares), peatland pool Severnoe (open triangles) and stream Chernyi (open circles)

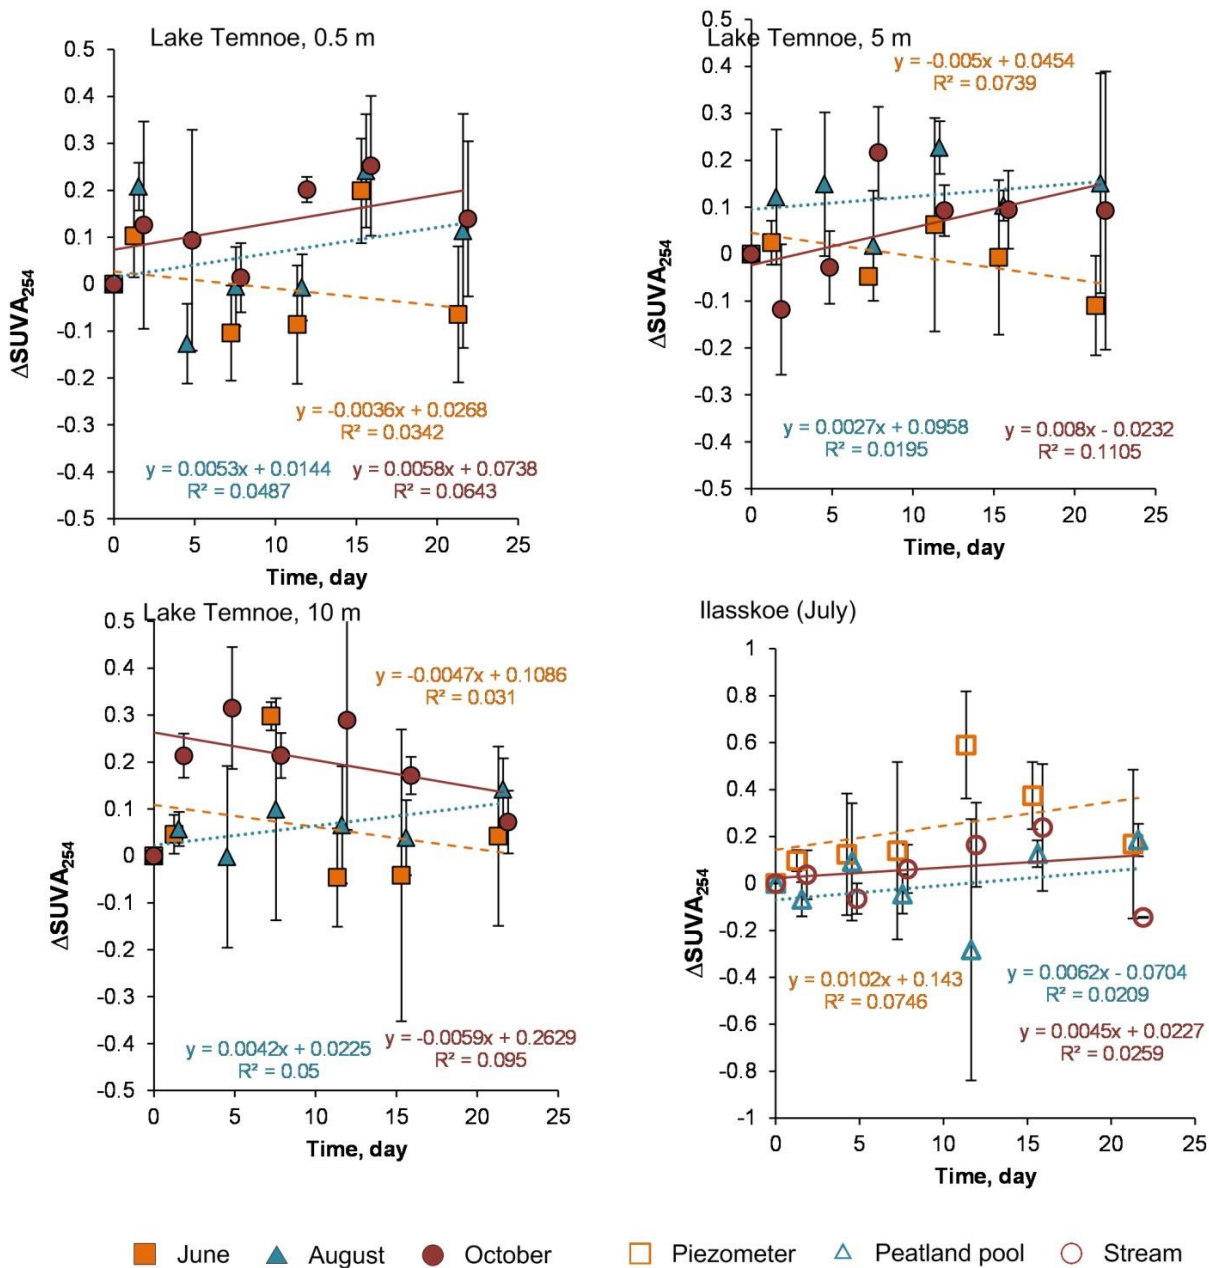

**Fig. S3.** The change of  $SUVA_{254}$  over time in bio-degradation experiments. The error bars represent 1 s.d. of duplicates. Lake Temnoe 0.5 m (A), 5 m (B) and 10 m (C) in June (squares), August (triangles) and October (circles). Ilasskoe continuum in July (D) includes piezometer (open squares), peatland pool Severnoe (open triangles) and stream Chernyi (open circles)

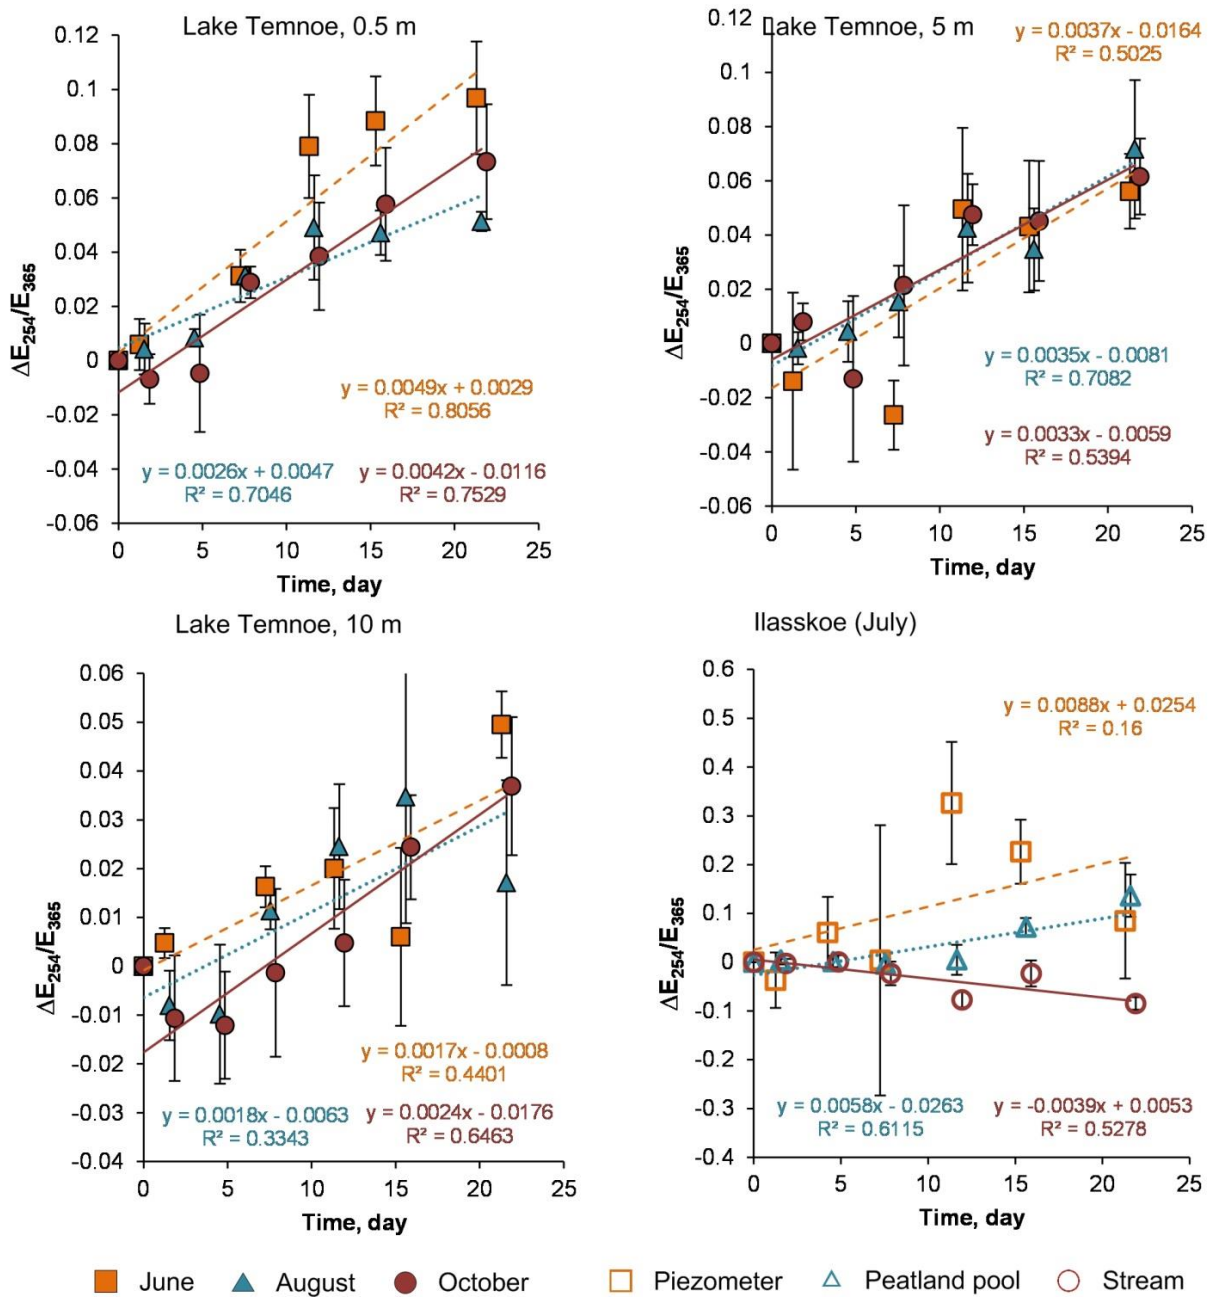

**Fig. S4.** The change of optical ratios ( $E_{254}/E_{365}$ ) over time in bio-degradation experiments. Lake Temnoe 0.5 m (A), 5 m (B) and 10 m (C) in June (squares), August (triangles) and October (circles). Ilasskoe continuum in July (D) includes piezometer (squares), peatland pool Severnoe (triangles) and stream Chernyi (circles)

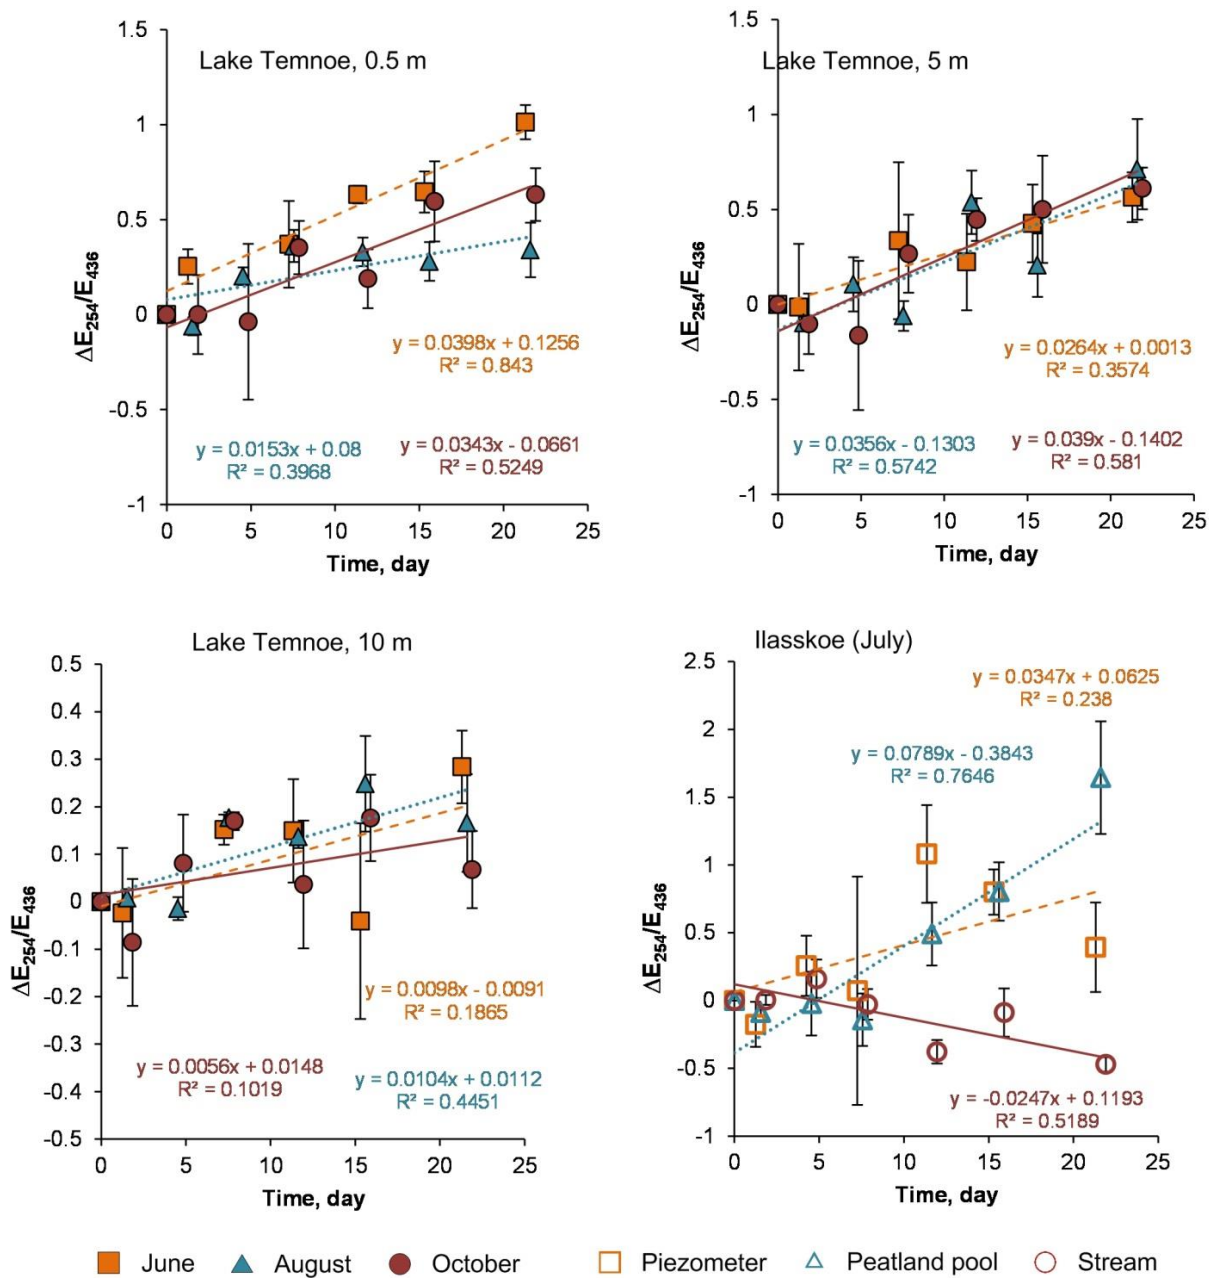

**Fig. S4**, continued. The change of optical ratios ( $E_{254}/E_{436}$ ) over time in bio-degradation experiments. Lake Temnoe 0.5 m (A), 5 m (B) and 10 m (C) in June (squares), August (triangles) and October (circles). Ilasskoe continuum in July (D) includes piezometer (squares), peatland pool Severnoe (triangles) and outlet stream Chernyi (circles)



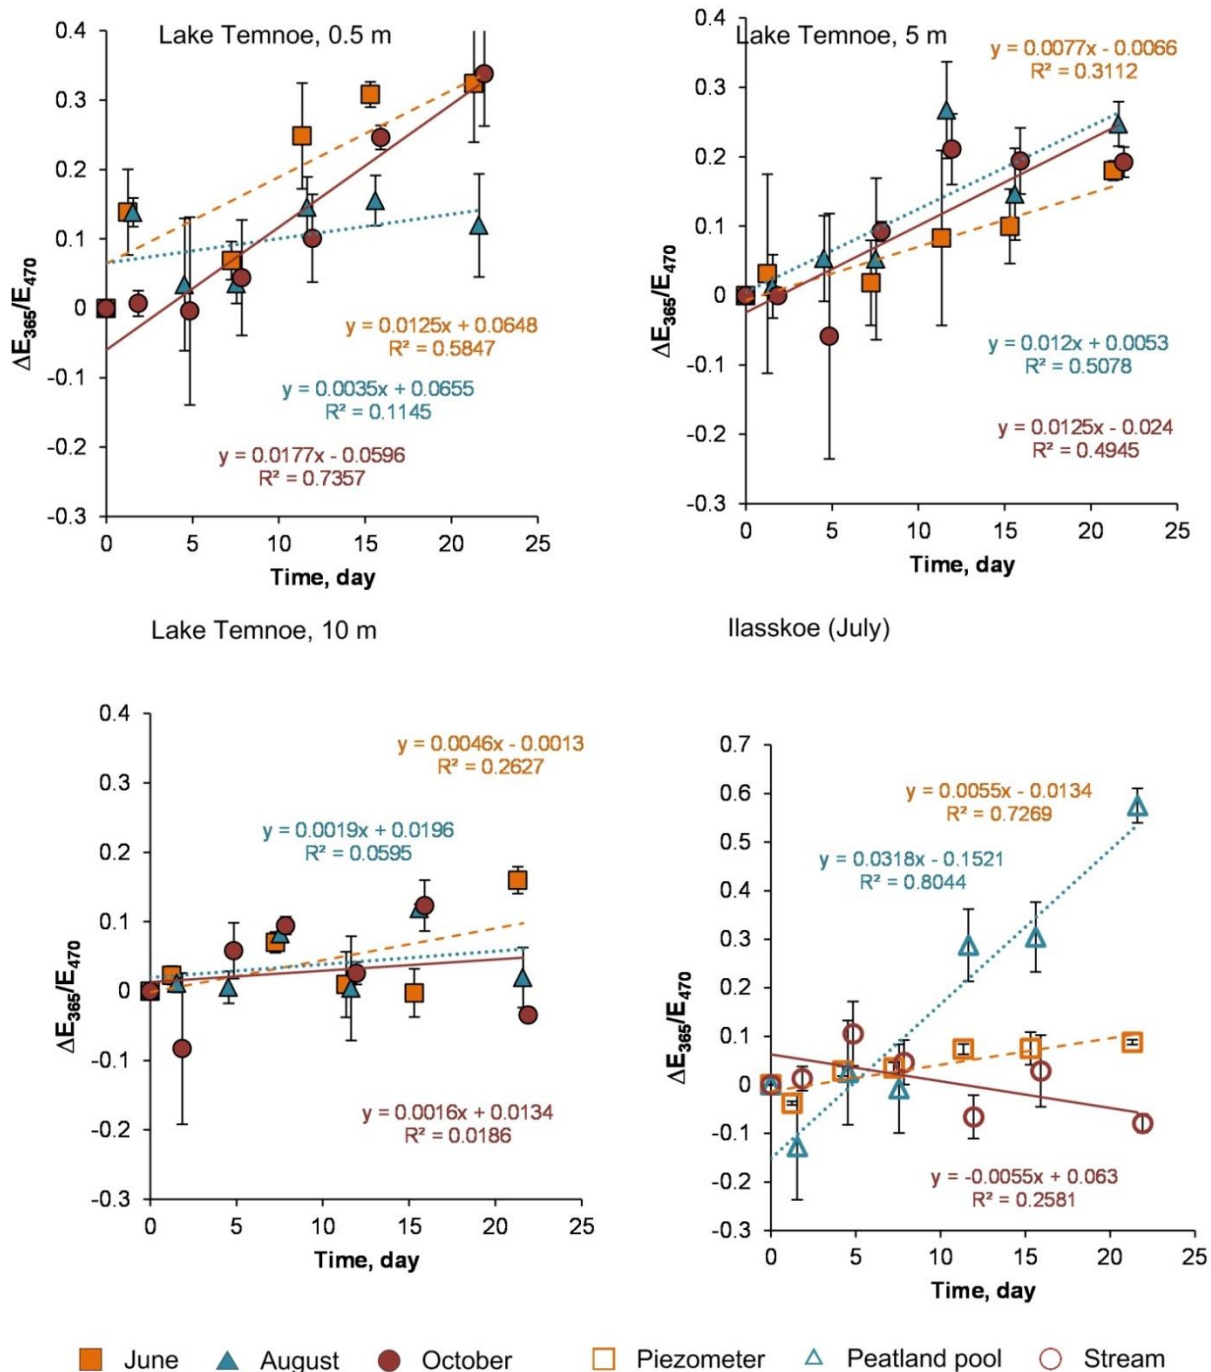

**Fig. S4**, continued. The change of optical ratios ( $E_{365}/E_{470}$ ) over time in bio-degradation experiments. Lake Temnoe 0.5 m (A), 5 m (B) and 10 m (C) in June (squares), August (triangles) and October (circles). Ilasskoe continuum in July (D) includes piezometer (squares), peatland pool Severnoe (triangles) and outlet stream Chernyi (circles)

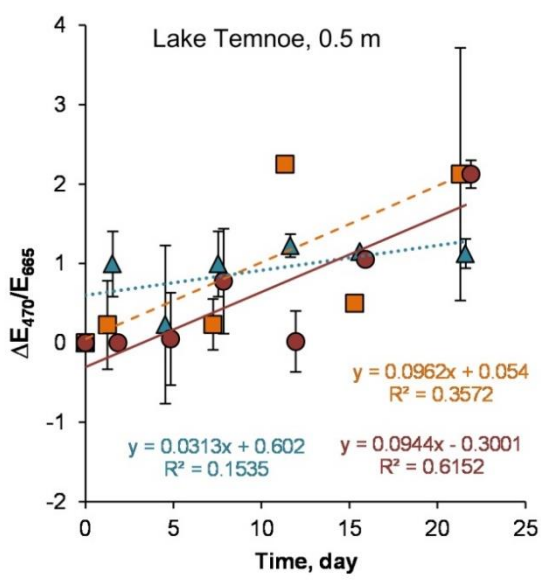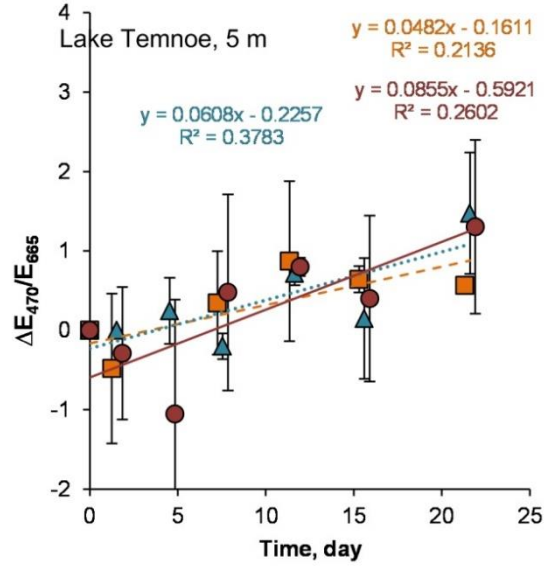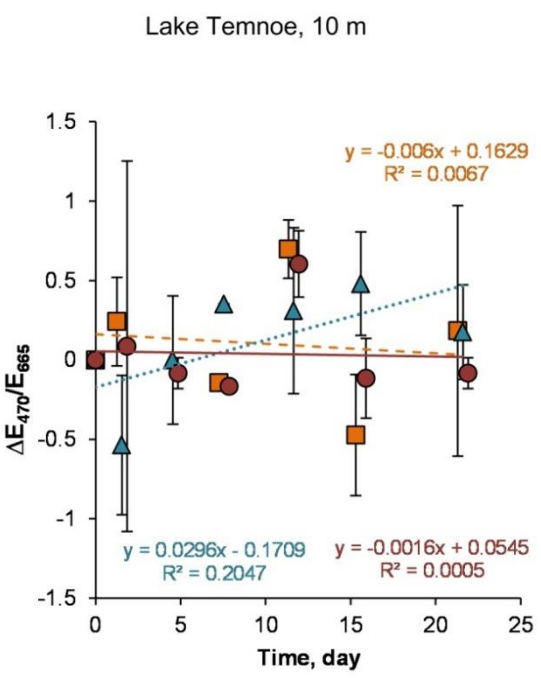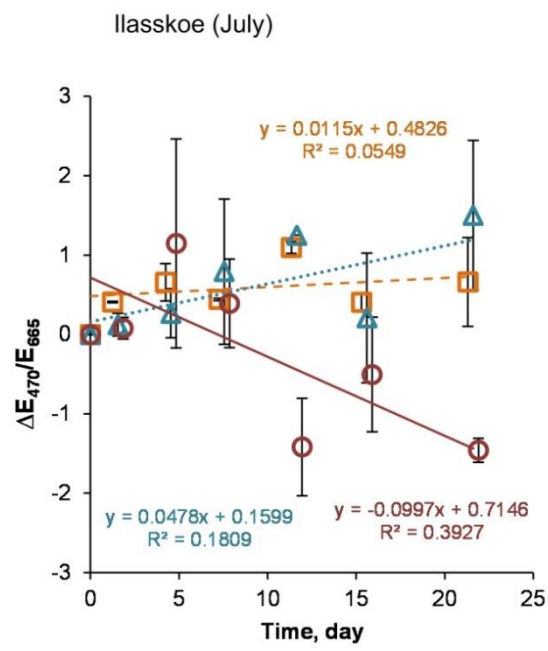

■ June   
 ▲ August   
 ● October   
  Piezometer   
  Peatland pool   
  Stream

**Fig. S4**, continued. The change of optical ratios ( $E_{470}/E_{665}$ ) over time in bio-degradation experiments. Lake Temnoe 0.5 m (A), 5 m (B) and 10 m (C) in June (squares), August (triangles) and October (circles). Illasskoe continuum in July (D) includes piezometer (squares), peatland pool Severnoe (triangles) and outlet stream Chernyi (circles)

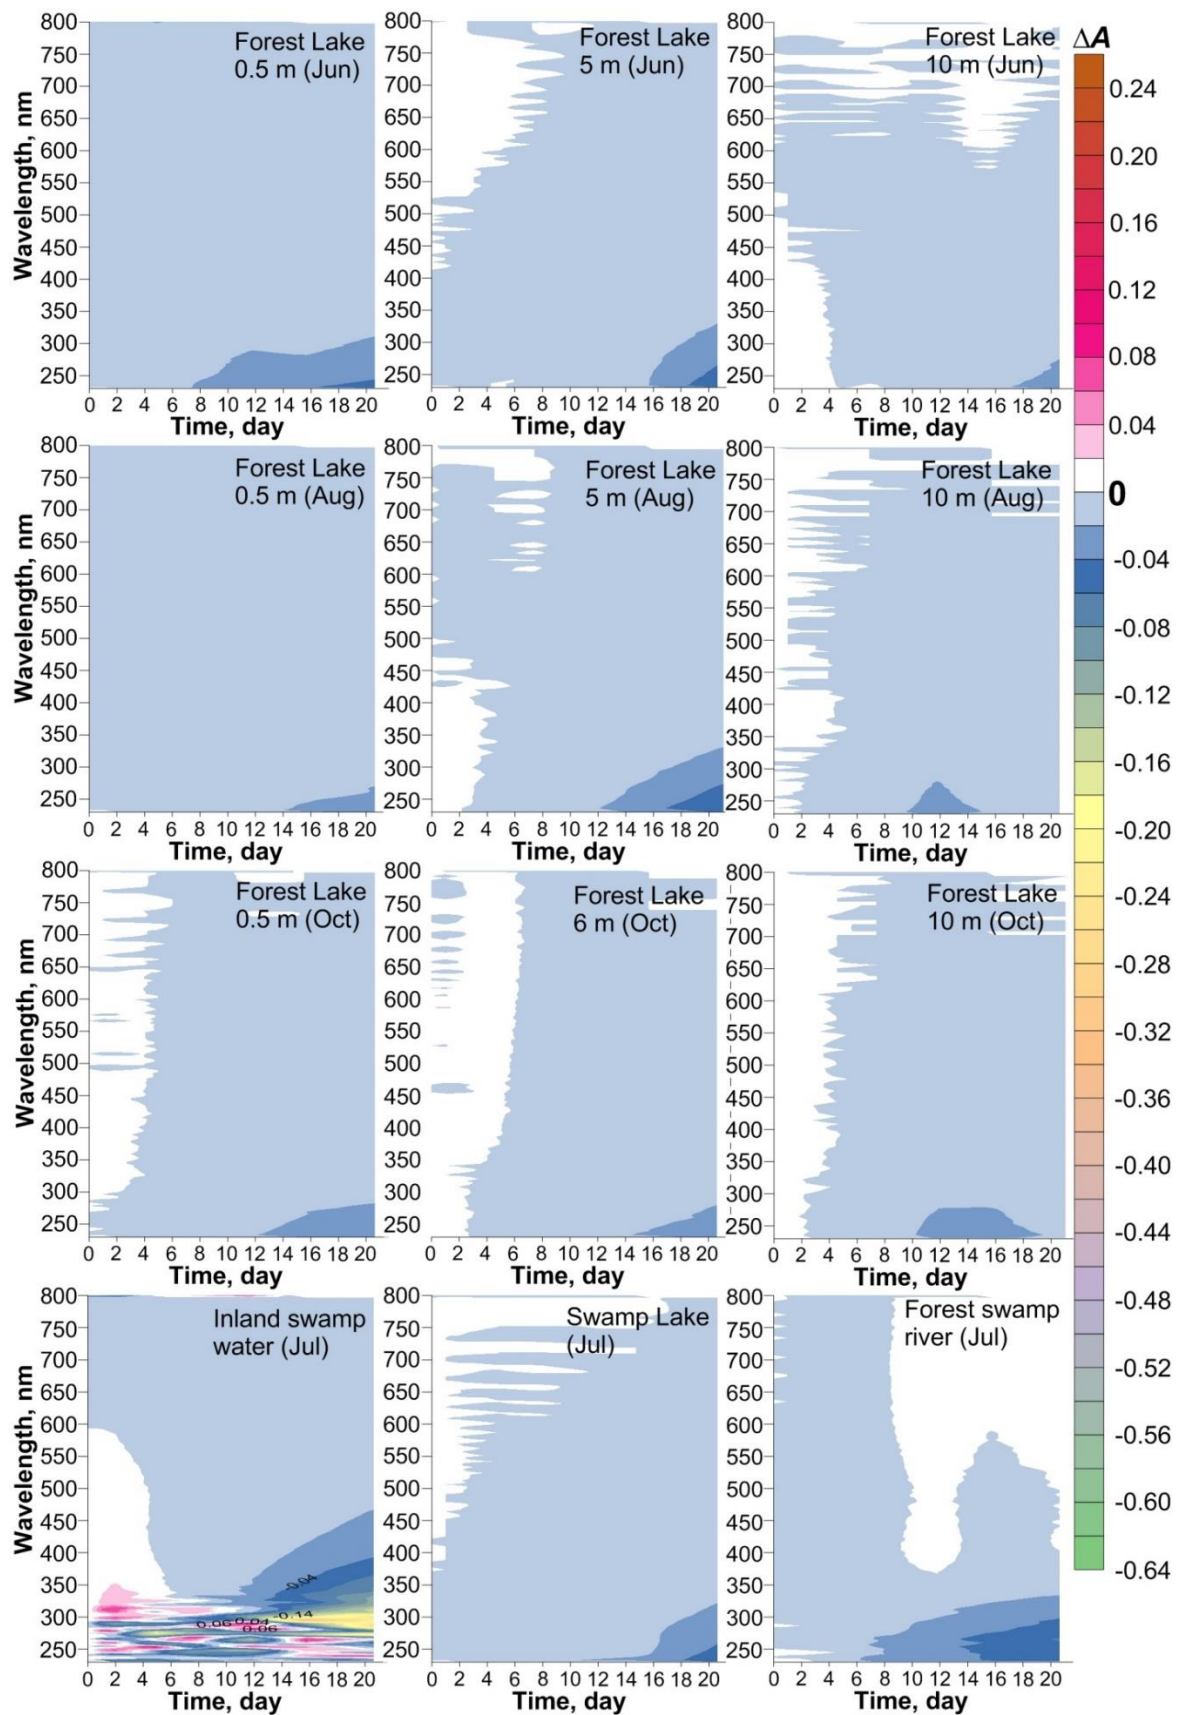

**Fig. S5.** Continuous optical spectra changes in the course of biodegradation experiments



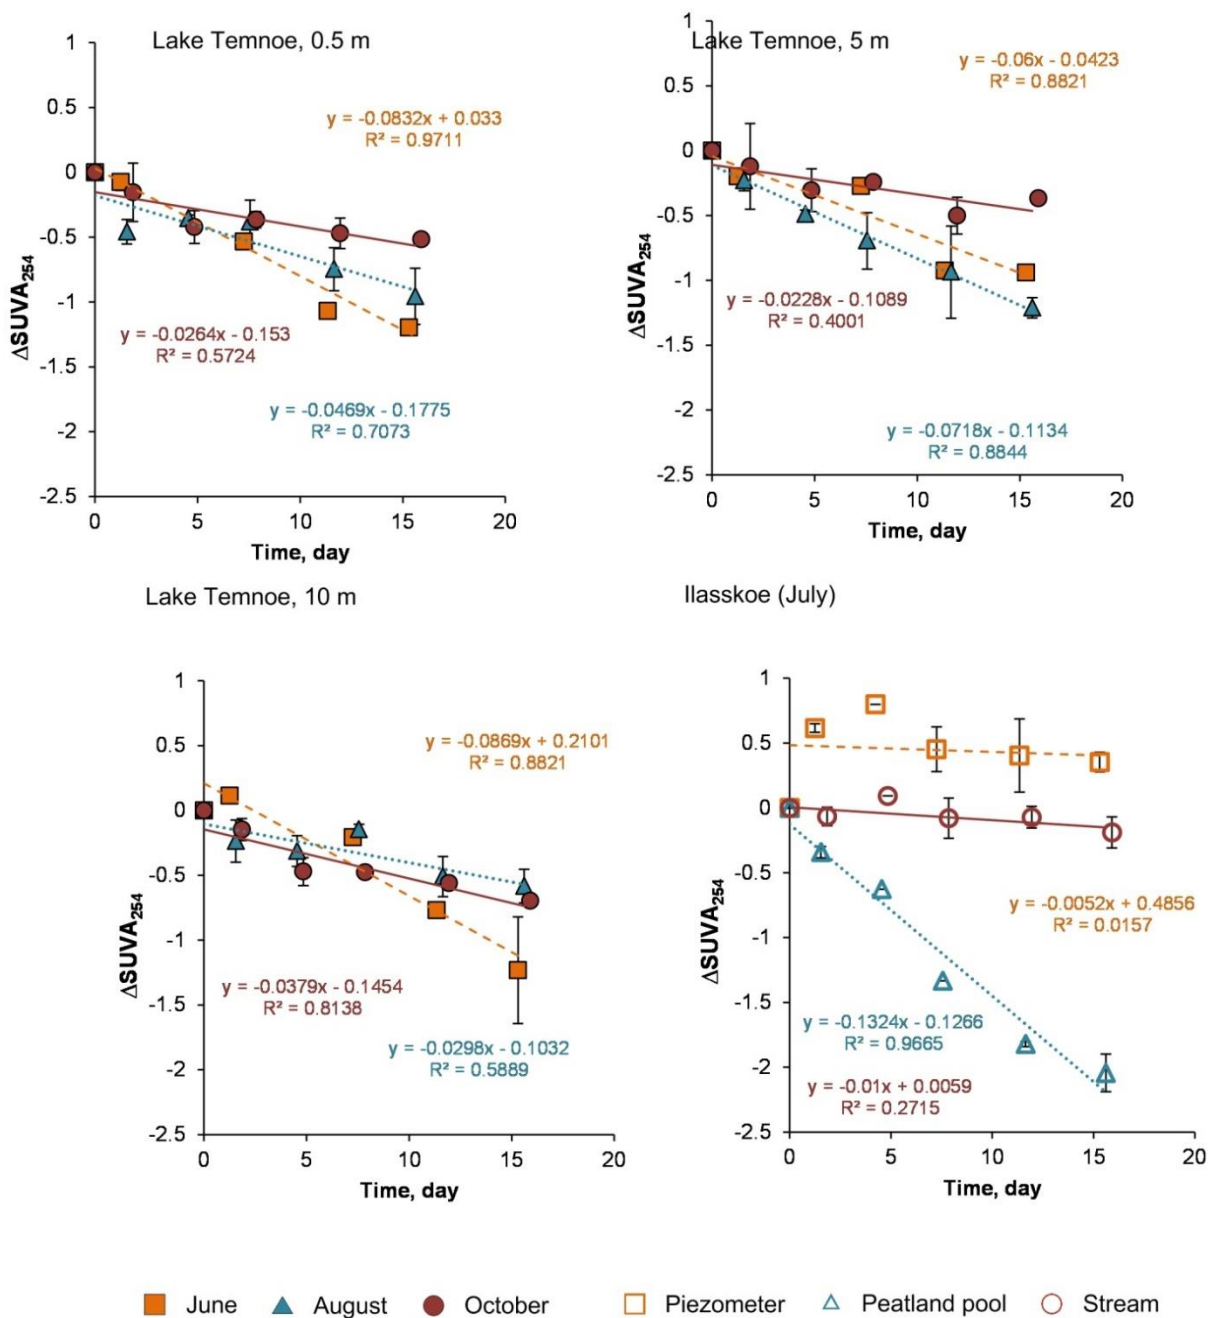

**Fig. S6.** The change of  $SUVA_{254}$  (relative to the control) over time in photodegradation experiments. Lake Temnoe 0.5 m (A), 5 m (B) and 10 m (C) in June (squares), August (triangles) and October (circles). Illasskoe continuum in July (D) includes piezometer (squares), peatland pool Severnoe (triangles) and stream Chernyi (circles).

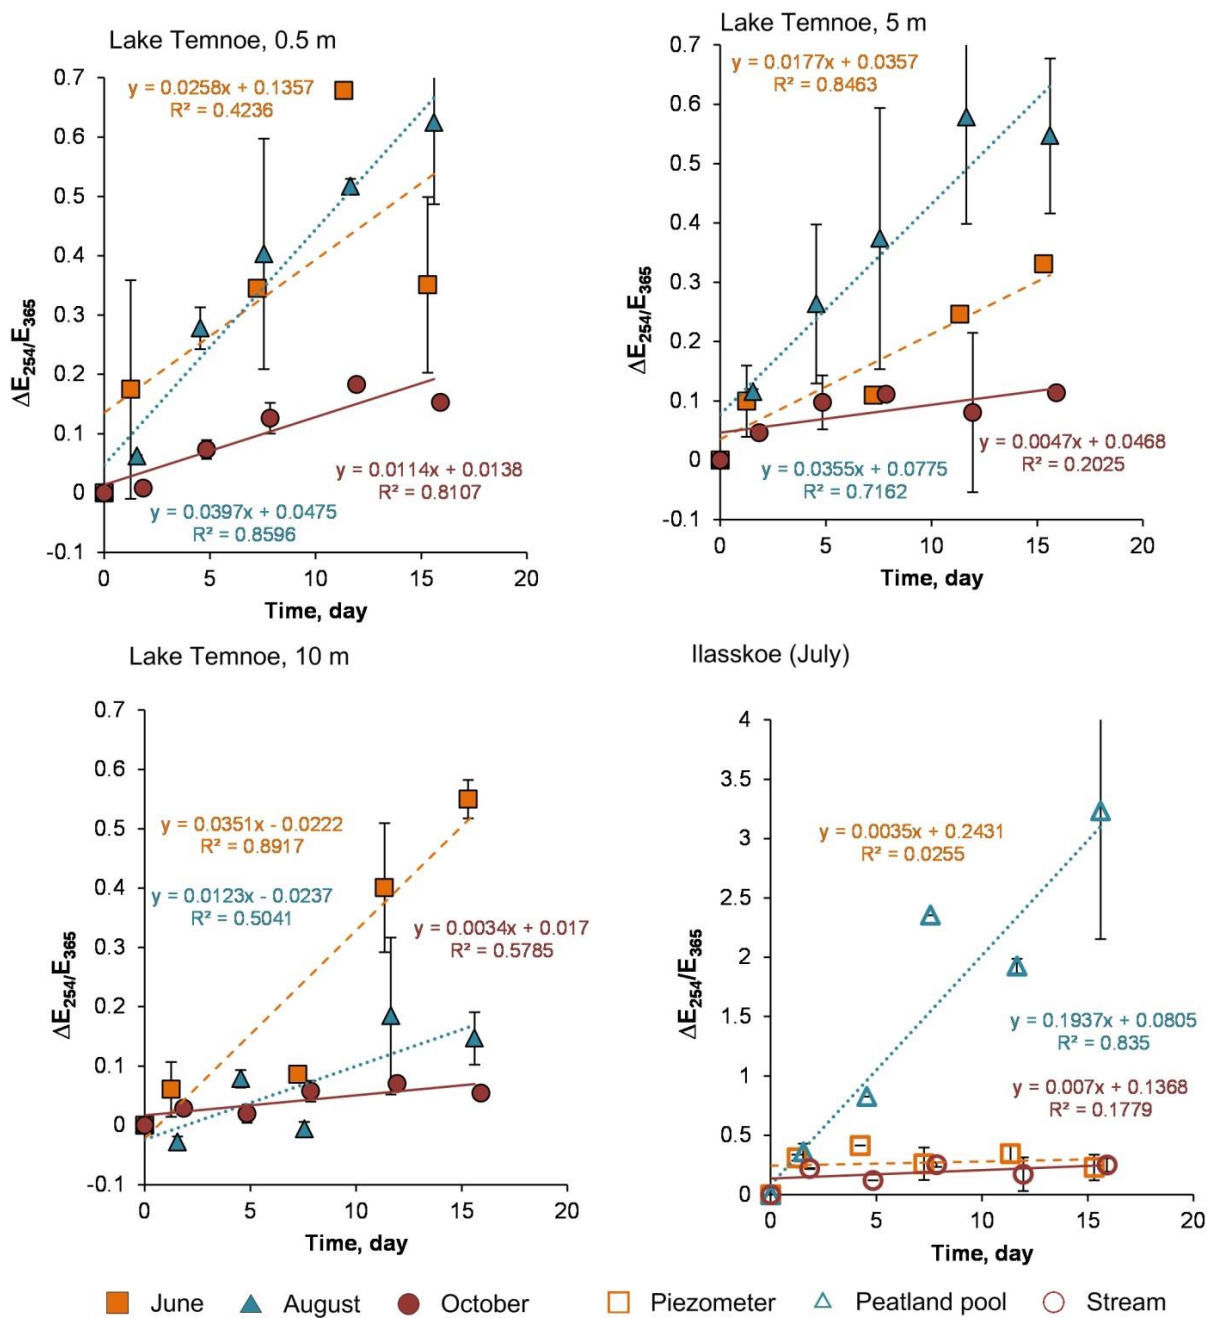

**Fig. S7.** The change of optical ratios ( $E_{254}/E_{365}$ ) over time in photodegradation experiments. Lake Temnoe 0.5 m (A), 5 m (B) and 10 m (C) in June (squares), August (triangles) and October (circles). Ilasskoe continuum in July (D) includes piezometer (squares), peatland pool Severnoe (triangles) and stream Chernyi (circles)

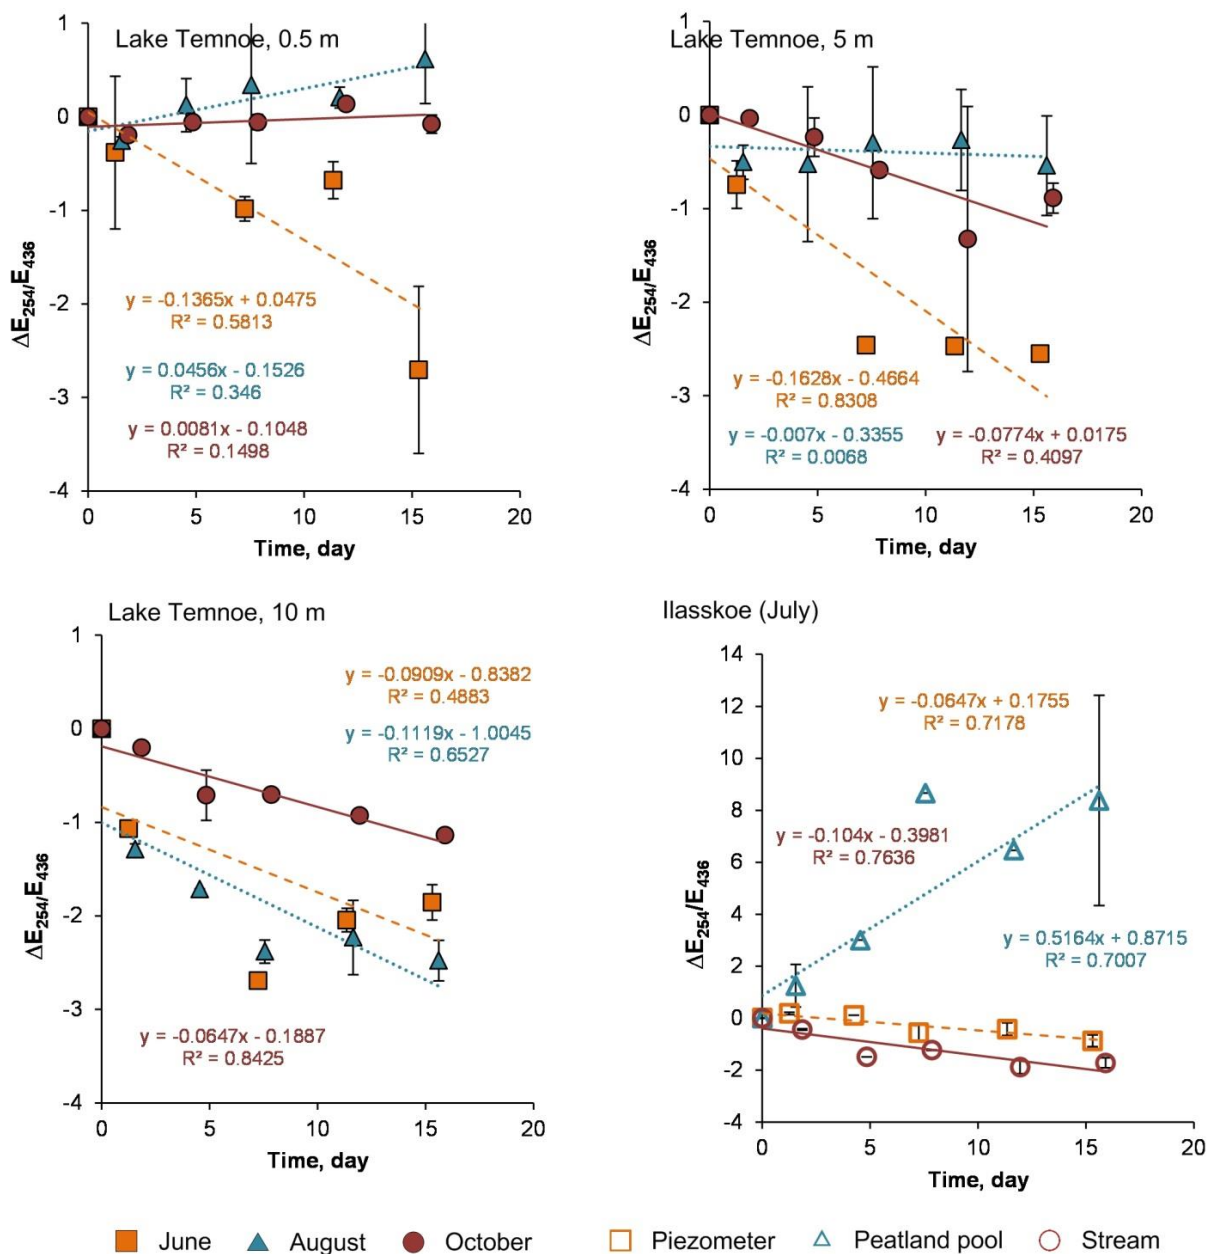

**Fig. S7, continued.** The change of optical ratios ( $E_{254}/E_{436}$ ) over time in photodegradation experiments. Lake Temnoe 0.5 m (A), 5 m (B) and 10 m (C) in June (squares), August (triangles) and October (circles). Ilasskoe continuum in July (D) includes piezometer (squares), peatland pool Severnoe (triangles) and stream Chernyi (circles)

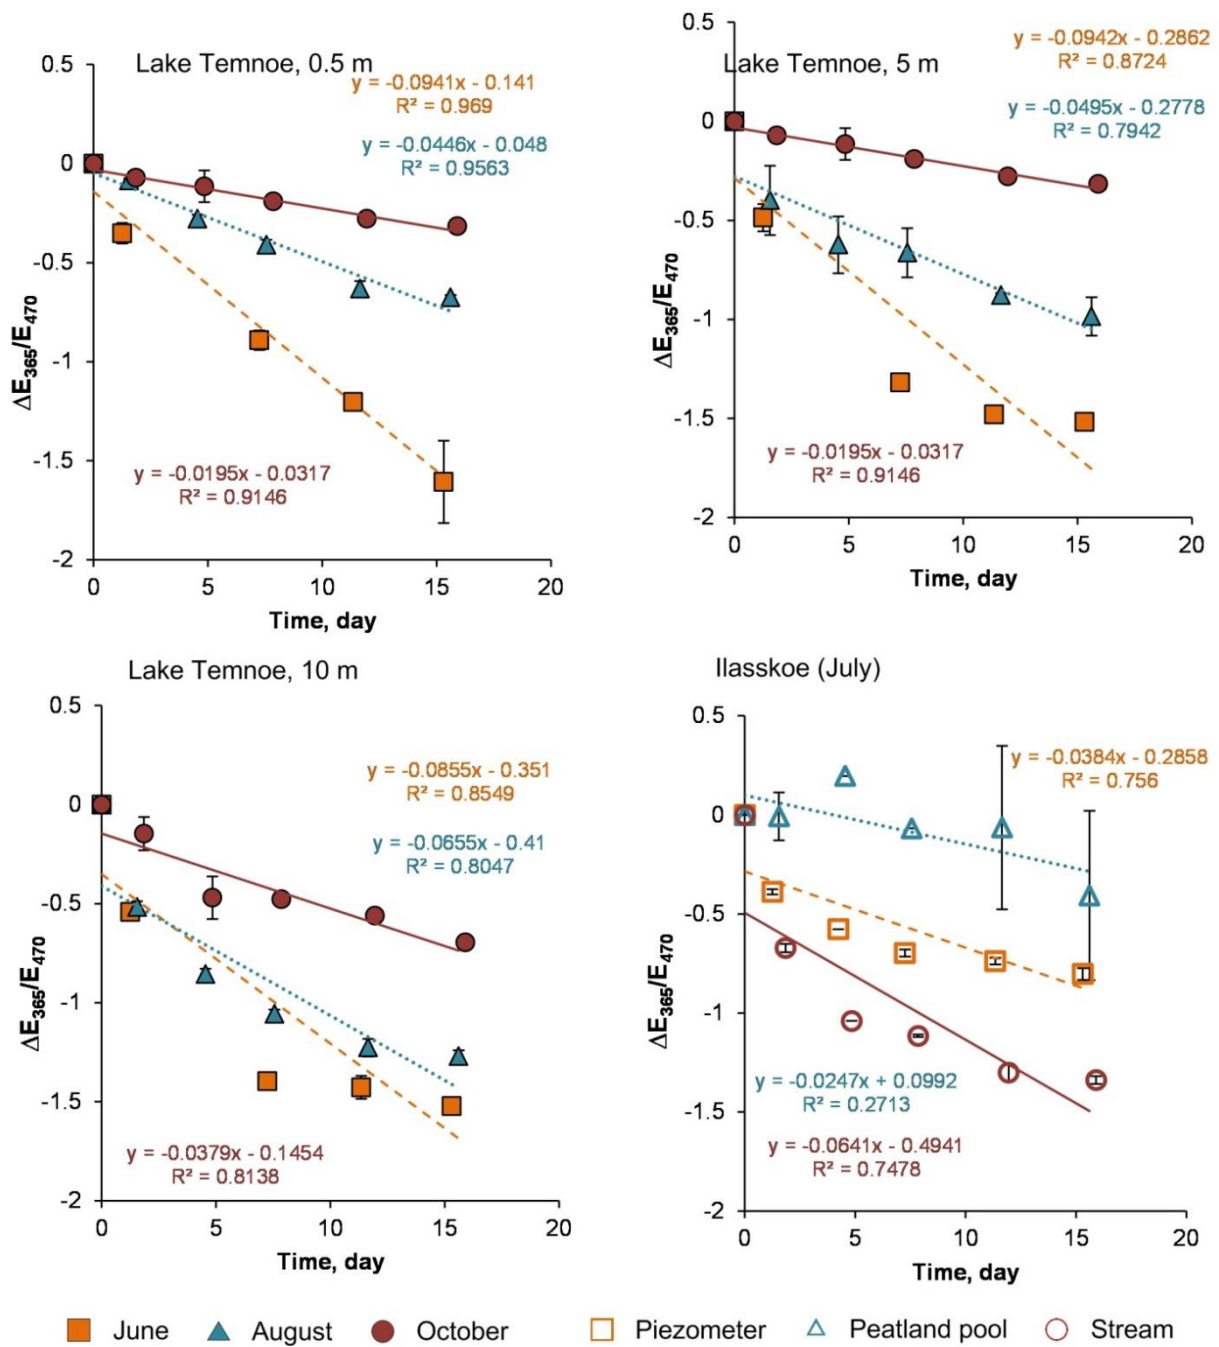

**Fig. S7, continued.** The change of optical ratios ( $E_{365}/E_{470}$ ) over time in photodegradation experiments. Lake Temnoe 0.5 m (A), 5 m (B) and 10 m (C) in June (squares), August (triangles) and October (circles). Ilaskoe continuum in July (D) includes piezometer (squares), peatland pool Severnoe (triangles) and stream Chernyi (circles)

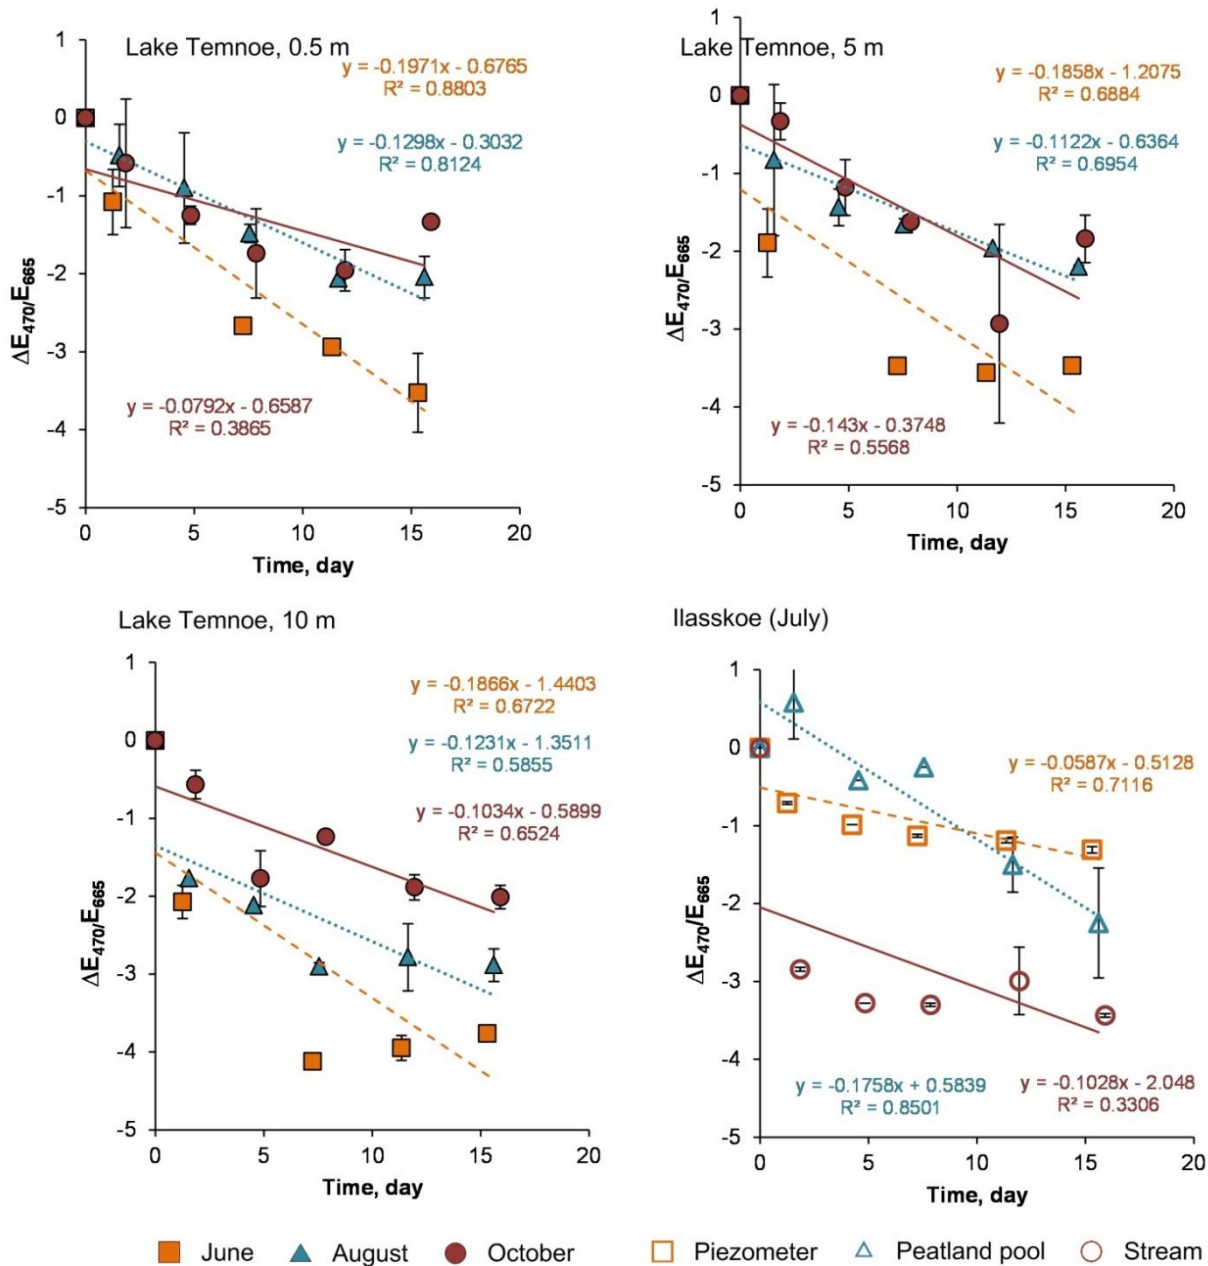

**Fig. S7**, continued. The change of optical ratios ( $E_{470}/E_{665}$ ) over time in photodegradation experiments. Lake Temnoe 0.5 m (A), 5 m (B) and 10 m (C) in June (squares), August (triangles) and October (circles). Ilasskoe continuum in July (D) includes piezometer (squares), peatland pool Severnoe (triangles) and stream Chernyi (circles)



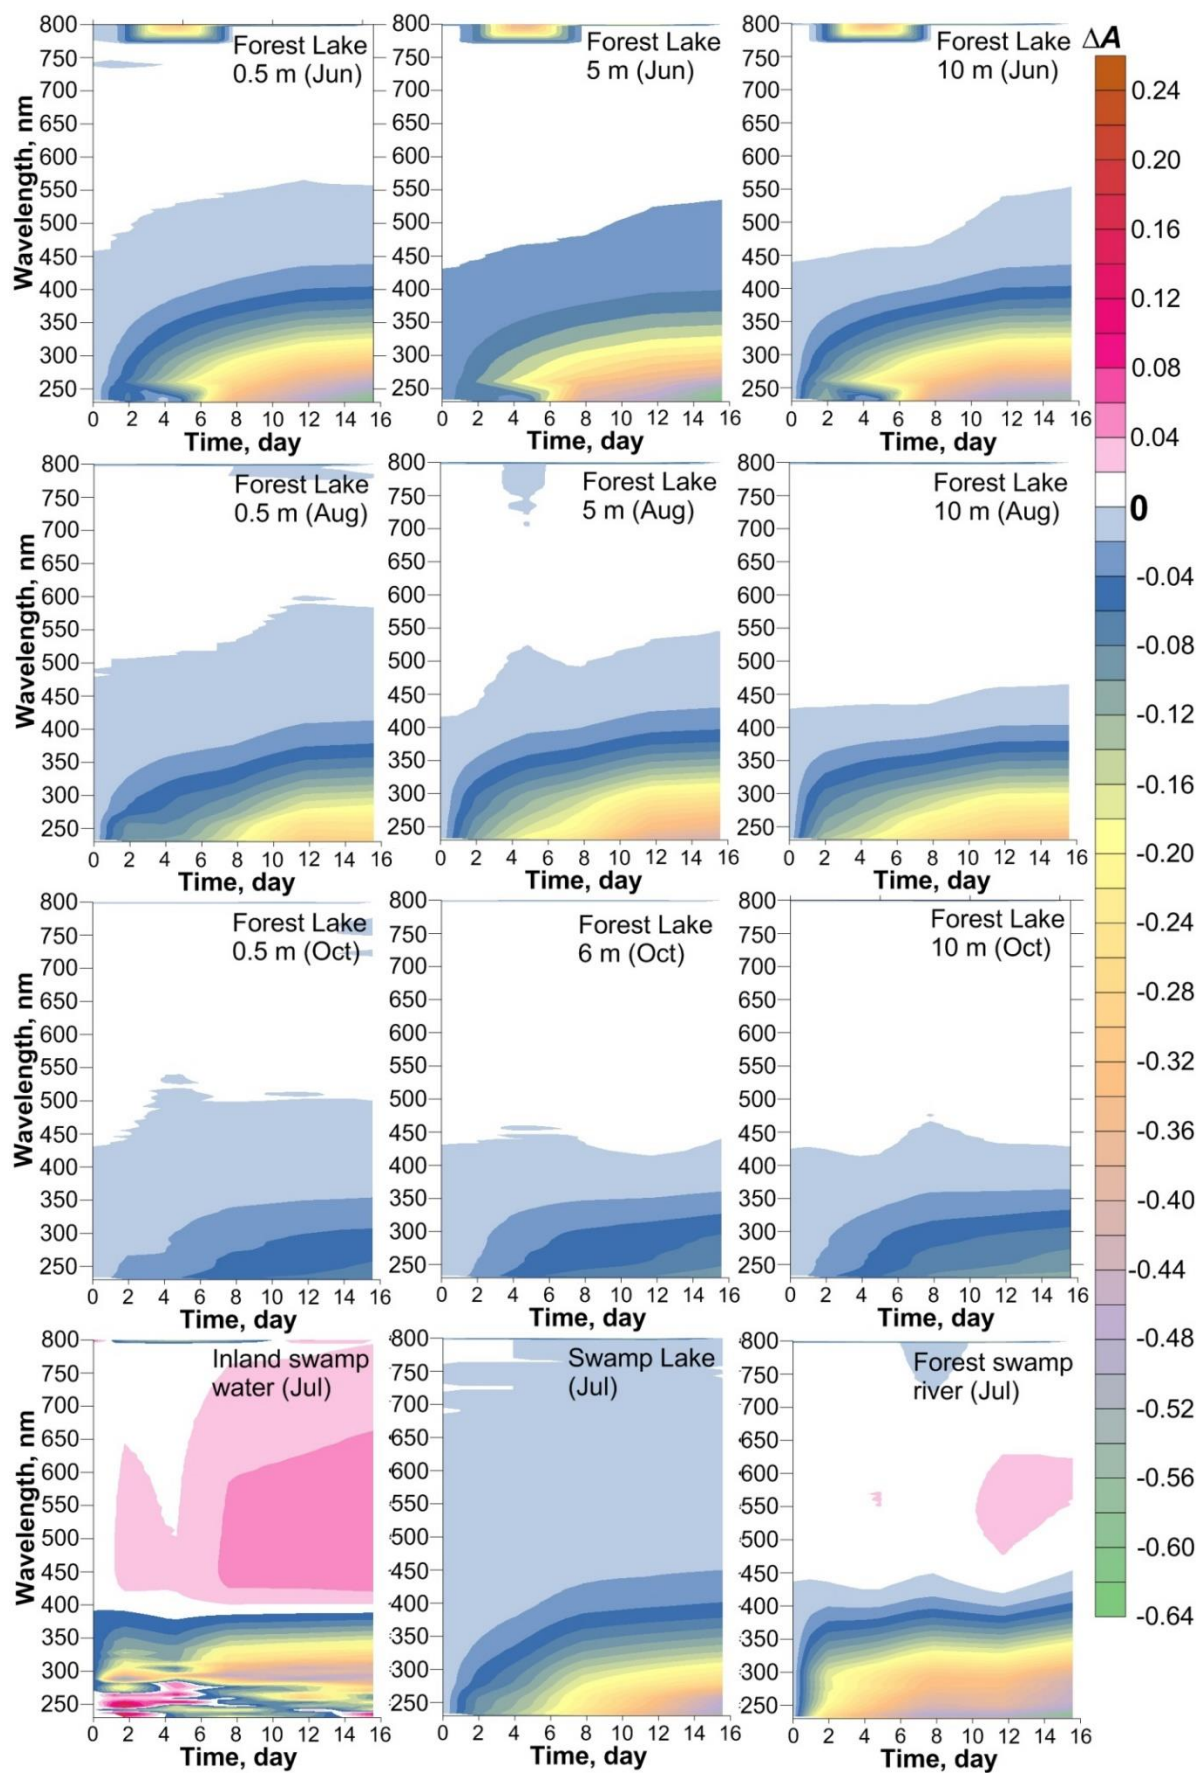

**Fig. S8.** Continuous optical spectra changes in the course of photodegradation experiments

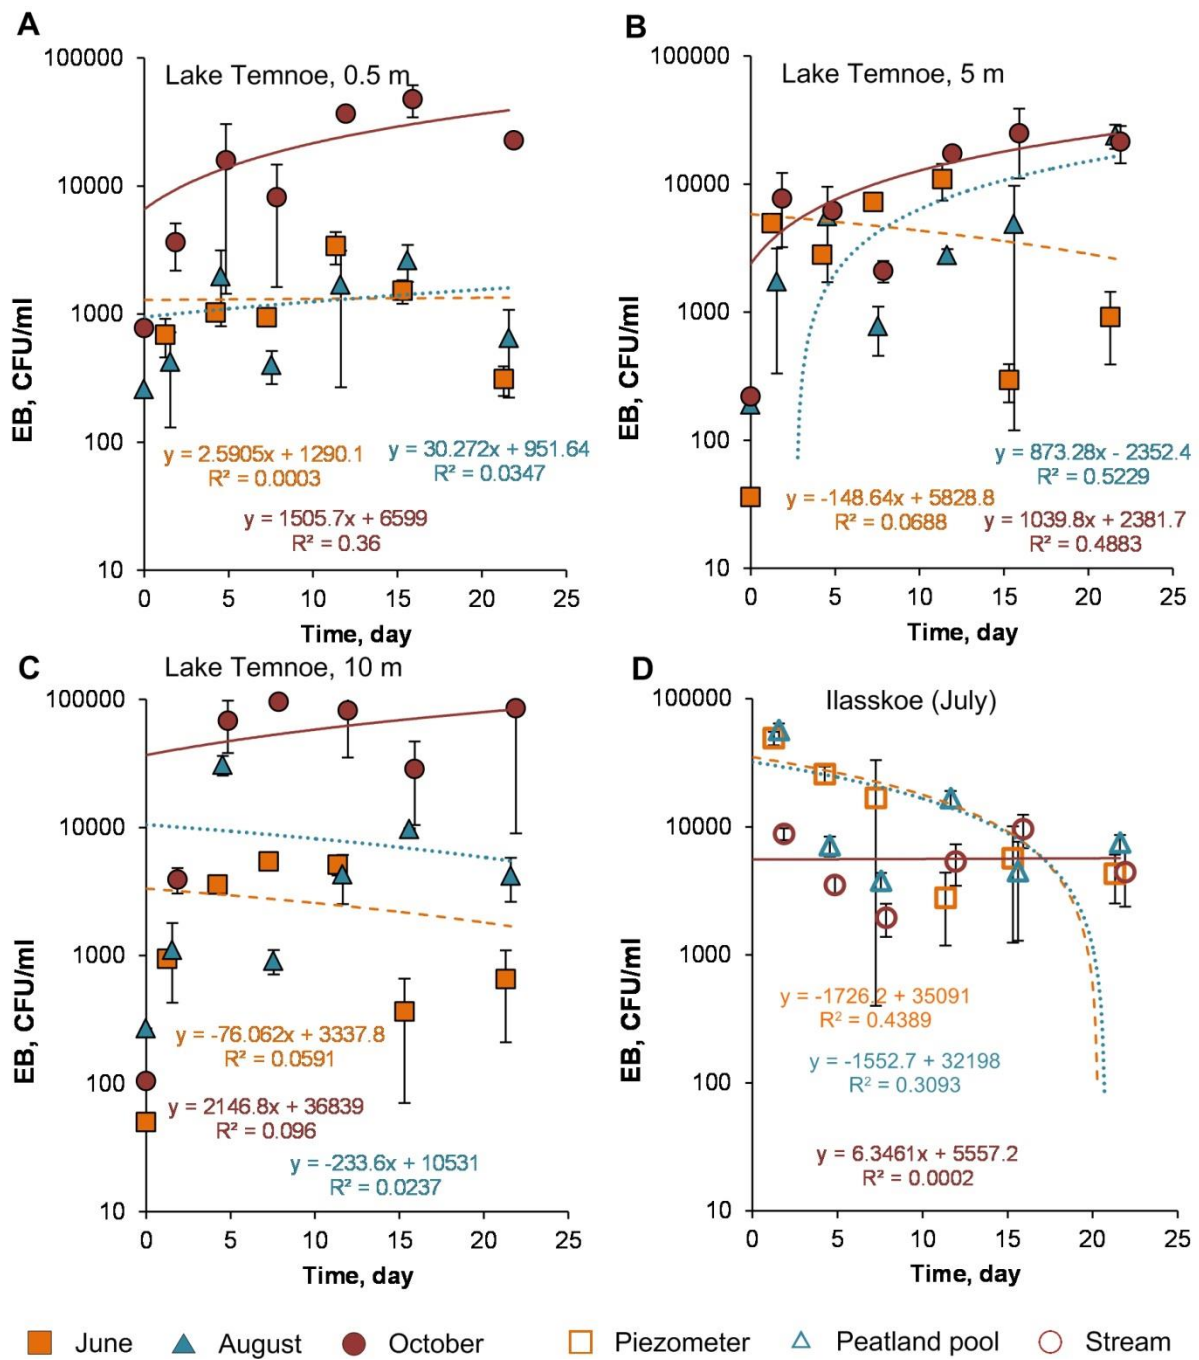

**Fig. S9.** Results on eutrophic bacterial counts in bio-degradation experiments. Lake Temnoe 0.5 m (A), 5 m (B) and 10 m (C) in June (squares), August (triangles) and October (circles). Ilasskoe Bog continuum in July (D) includes piezometer (squares), peatland pool Severnoe (triangles) and stream Chernyi (circles).

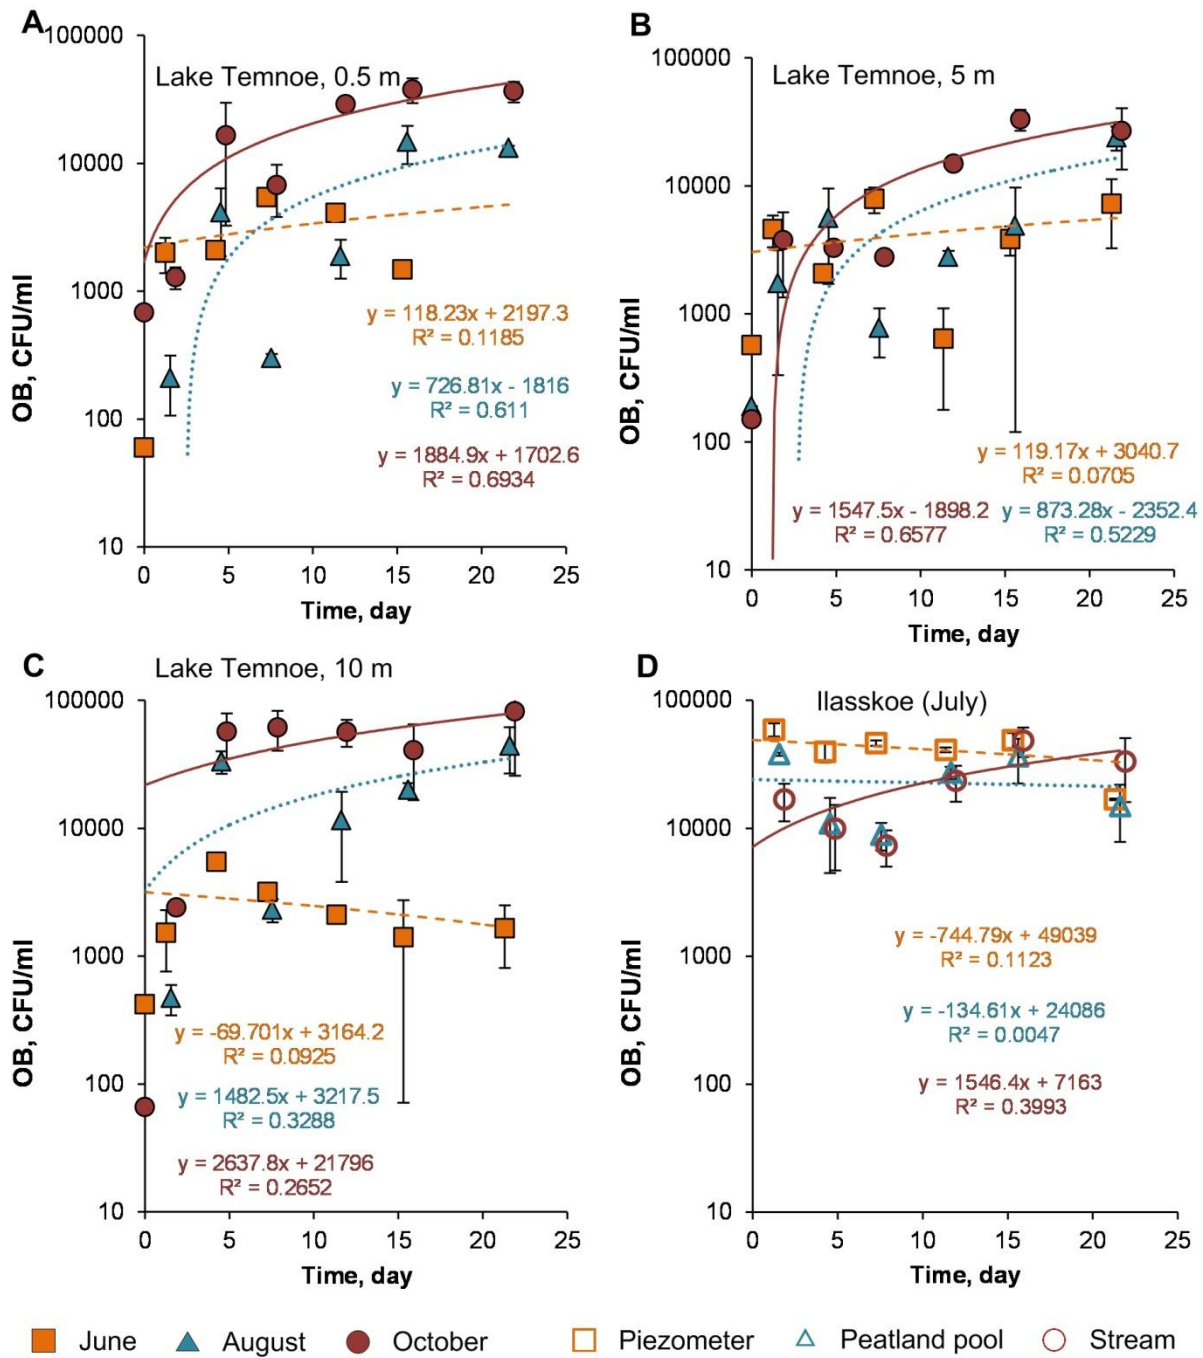

**Fig S9**, continued. Results on oligotrophic bacterial counts in bio-degradation experiments. Lake Temnoe 0.5 m (A), 5 m (B) and 10 m (C) in June (squares), August (triangles) and October (circles). Ilasskoe continuum in July (D) includes piezometer (squares), peatland pool Severnoe (triangles) and stream Chernyi (circles).

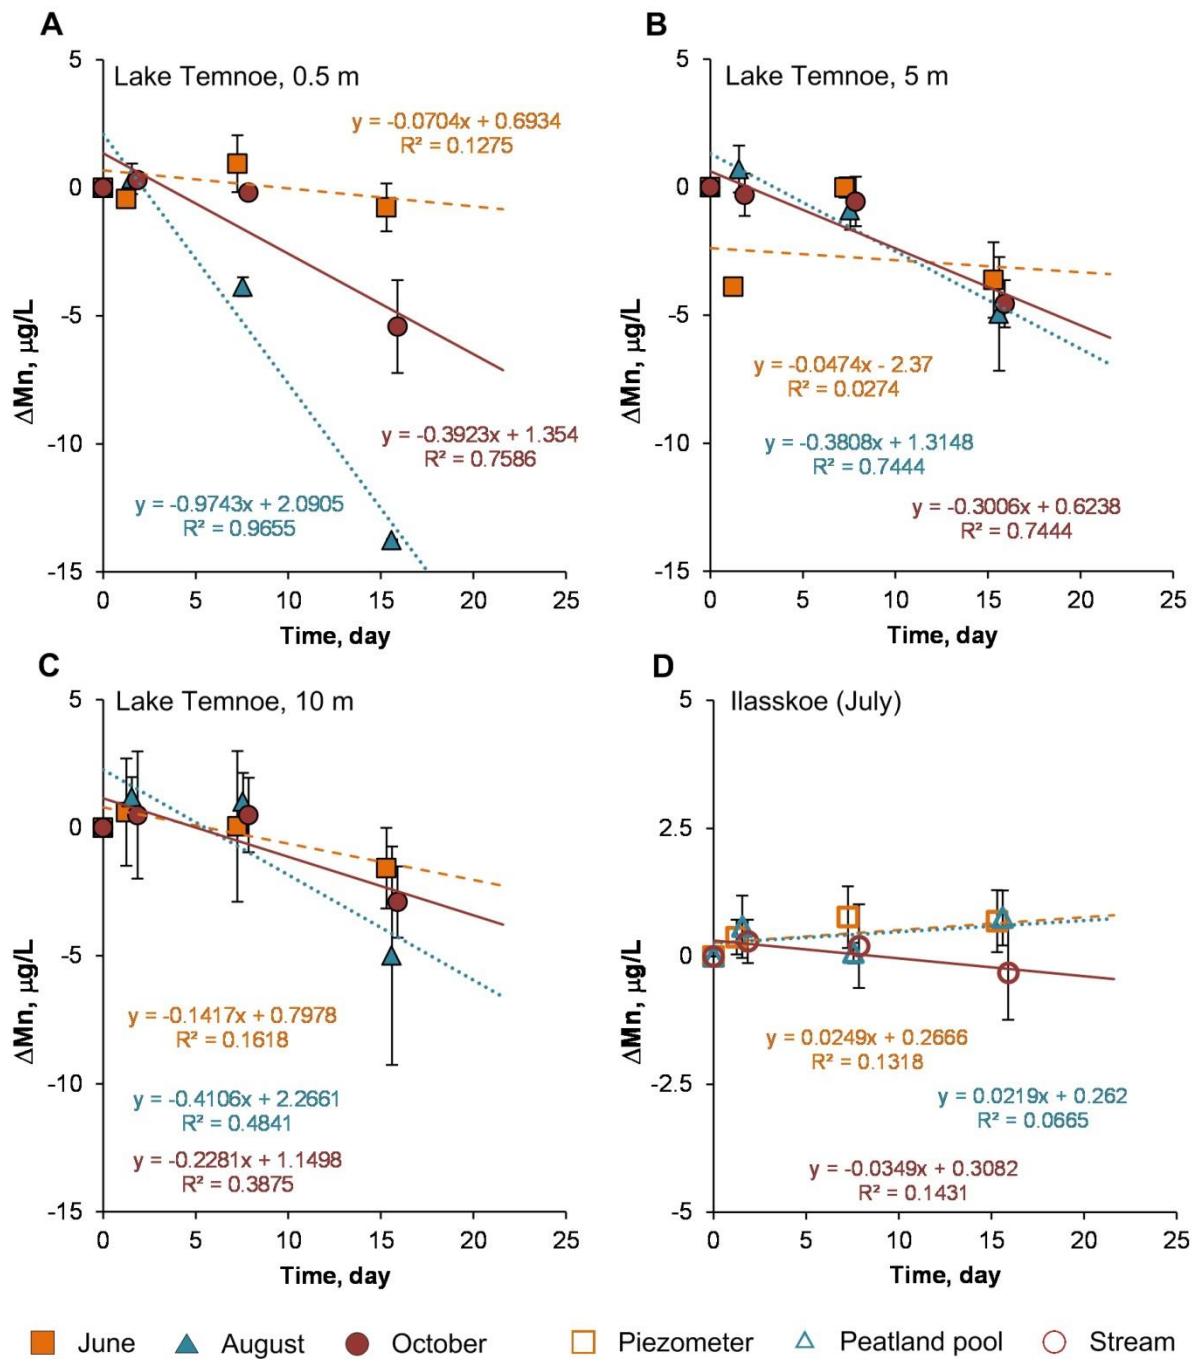

**Fig. S10.** Change in Mn concentration (relative to the control) over time in bio-degradation experiments. The error bars are 1 s.d. of duplicates. Lake Temnoe 0.5 m (A), 5 m (B) and 10 m (C) in June (squares), August (triangles) and October (circles). Ilasskoe continuum in July (D) includes piezometer (squares), peatland pool Severnoe (triangles) and stream Chernyi (circles)



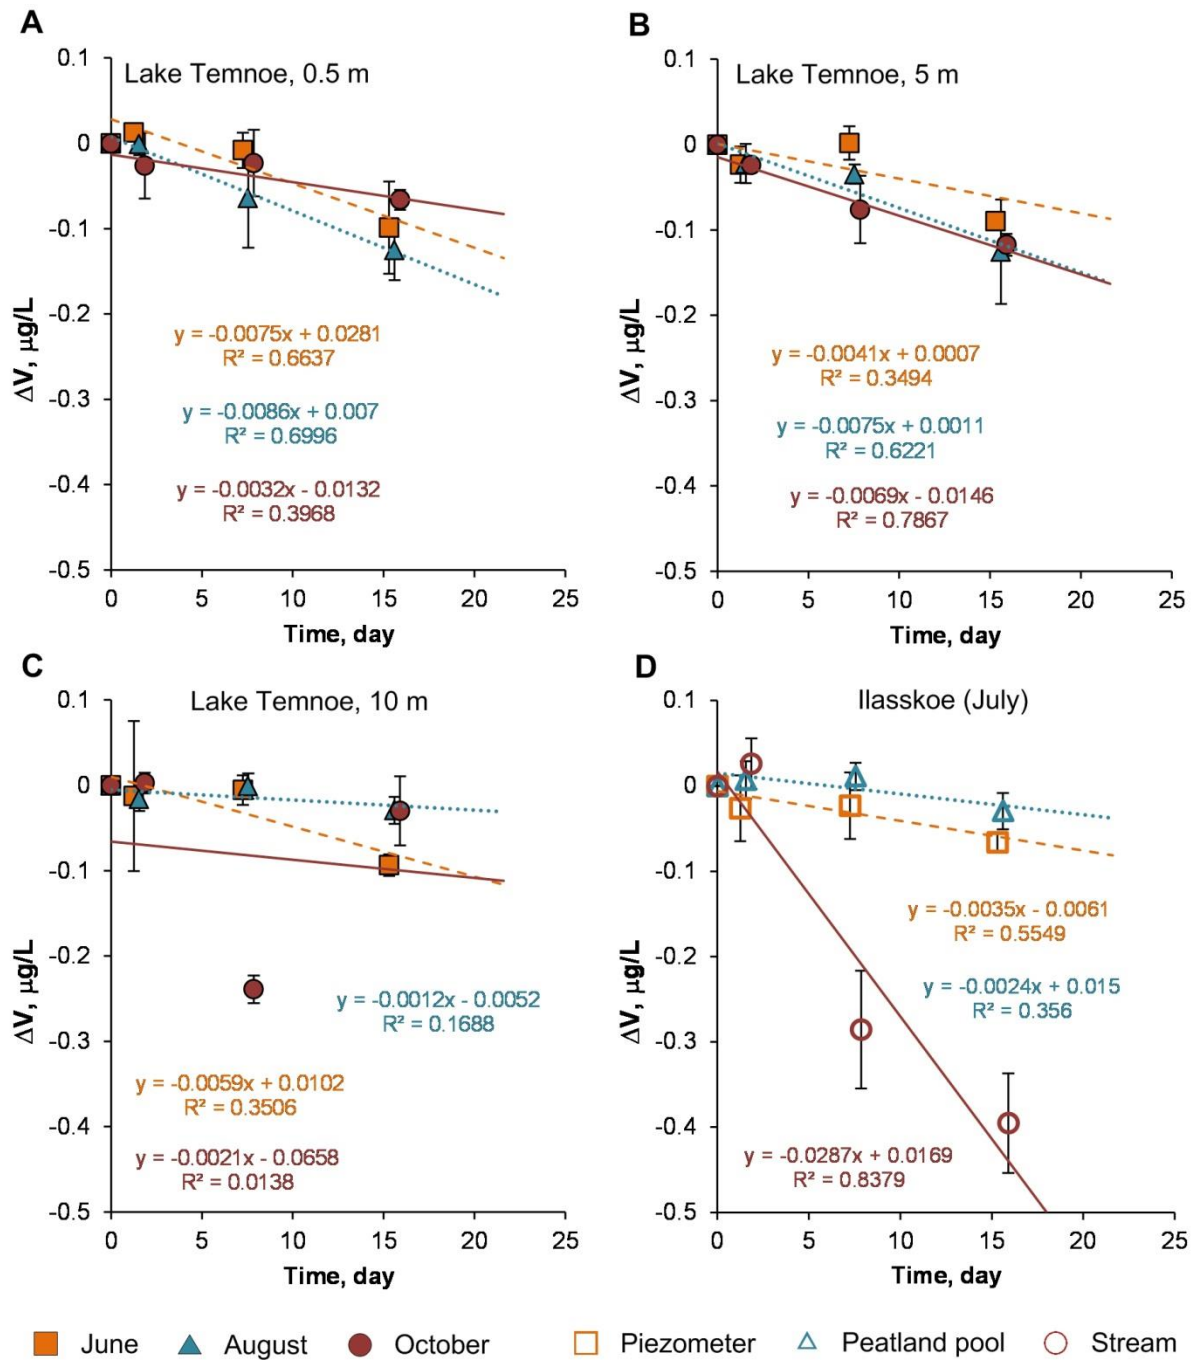

**Fig. S11.** Change in V concentration (relative to the control) over time in bio-degradation experiments. The error bars are 1 s.d. of duplicates. Lake Temnoe 0.5 m (A), 5 m (B) and 10 m (C) in June (squares), August (triangles) and October (circles). Ilasskoe continuum in July (D) includes piezometer (squares), peatland pool Severnoe (triangles) and stream Chernyi (circles)



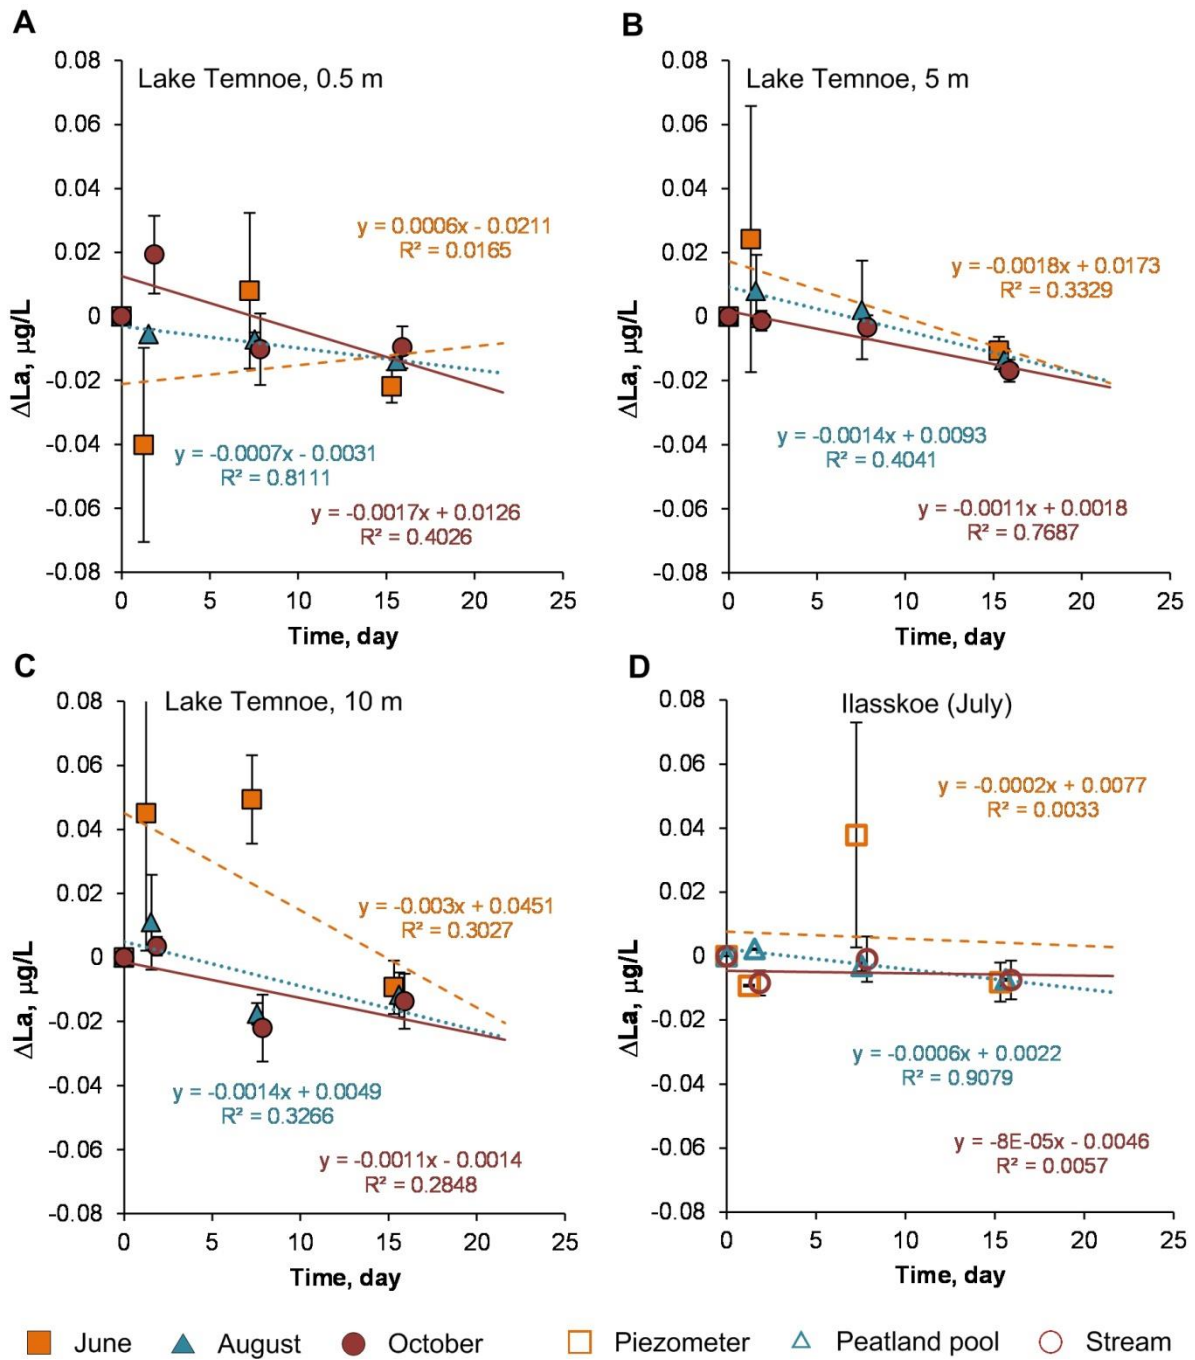

**Fig. S12.** Change in La concentration (relative to the control) over time in bio-degradation experiments. The error bars are 1 s.d. of duplicates. Lake Temnoe 0.5 m (A), 5 m (B) and 10 m (C) in June (squares), August (triangles) and October (circles). Ilasskoe continuum in July (D) includes piezometer (squares), peatland pool Severnoe (triangles) and stream Chernyi (circles)

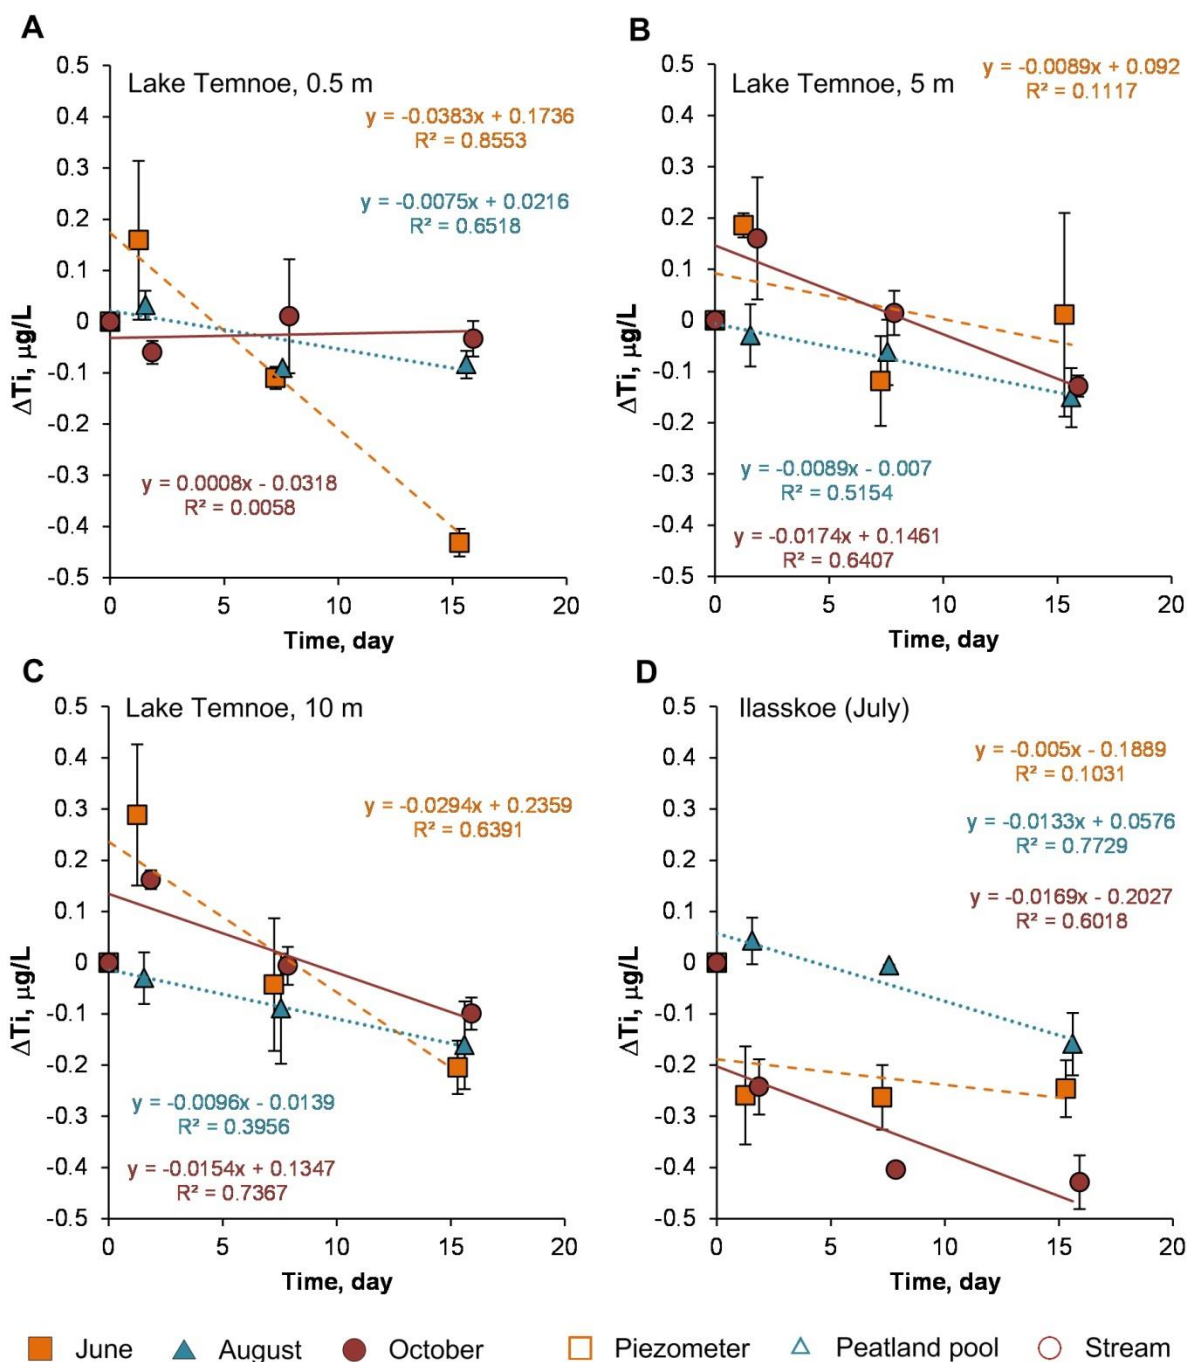

**Fig. S13.** Change in Ti concentration (relative to the control) over time in photodegradation experiments. The error bars are 1 s.d. of duplicates. Lake Temnoe 0.5 m (A), 5 m (B) and 10 m (C) in June (squares), August (triangles) and October (circles). Ilasskoe continuum in July (D) includes piezometer (squares), peatland pool Severnoe (triangles) and stream Chernyi (circles)

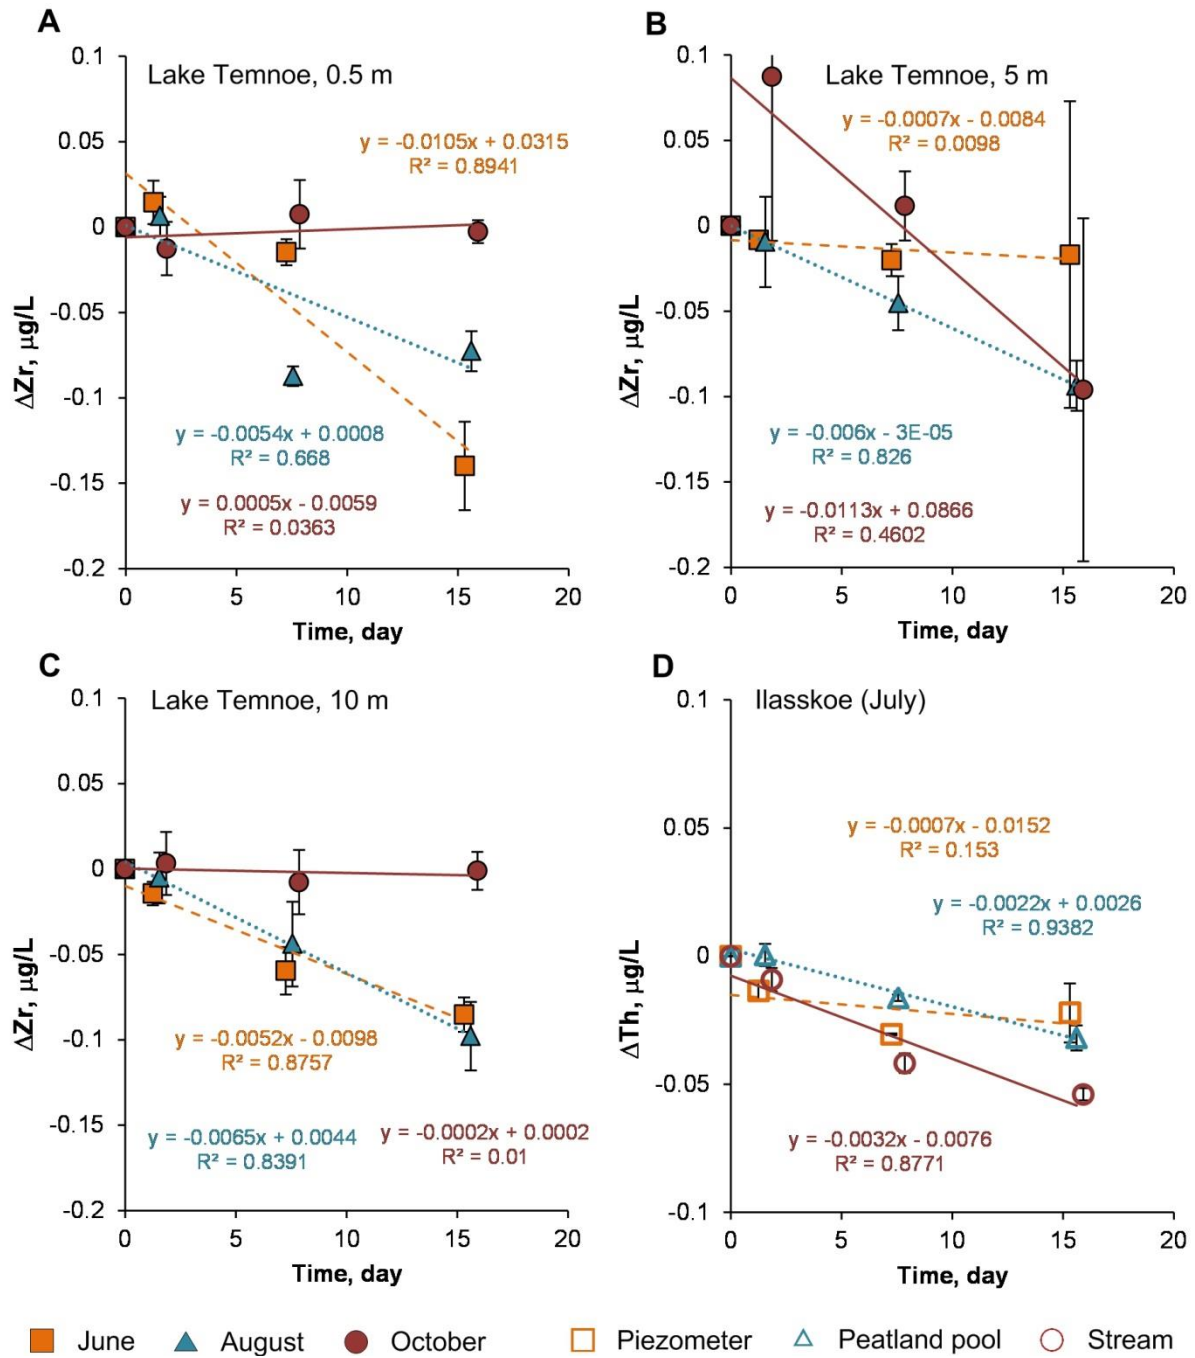

**Fig. S14.** Change in Zr concentration (relative to the control) over time in photodegradation experiments. The error bars are 1 s.d. of duplicates. Lake Temnoe 0.5 m (A), 5 m (B) and 10 m (C) in June (squares), August (triangles) and October (circles). Ilasskoe continuum in July (D) includes piezometer (squares), peatland pool Severnoe (triangles) and stream Chernyi (circles)
